1 **Short title:** Silencing of *TaCKX1* and grain yield

2 **Corresponding author:** Anna Nadolska-Orczyk. E-mail: a.orczyk@ihar.edu.pl

3

4 **Title:** Silencing of *TaCKX1* mediates expression of other *TaCKX* genes to  
5 increase grain yield in wheat

6

7 **Author names and affiliations:**

8 Bartosz Jabłoński<sup>1</sup>, Hanna Ogonowska<sup>1</sup>, Karolina Szala<sup>1</sup>, Andrzej Bajguz<sup>3</sup>, Wacław Orczyk<sup>2</sup>  
9 and Anna Nadolska-Orczyk<sup>1c</sup> (corresponding author: a.orczyk@ihar.edu.pl)

10

11 <sup>1</sup>Department of Functional Genomics, <sup>2</sup>Department of Genetic Engineering, Plant Breeding  
12 and Acclimatization Institute – National Research Institute, Radzikow, 05-870 Blonie, Poland

13 <sup>3</sup>Laboratory of Plant Biochemistry, Institute of Biology, University of Bialystok,  
14 Ciolkowskiego 1J, 15-245 Bialystok, Poland

15

16 **ORCID IDs:**

17 A.N-O.: 0000-0001-6127-3860

18 B.J.: 0000-0002-3386-5049

19 H.O.: 0000-0001-7385-1592

20 K.S.: 0000-0002-2951-8634

21 A.B.: 0000-0003-4275-0881

22 W.O.: 0000-0003-4735-0000

23

24 **One-sentence summary:** Different levels of *TaCKX1* silencing influence various models of  
25 coordinated expression of *TaCKX* genes and phytohormone levels in 7 DAP spikes, as well as  
26 yield parameters.

27

28 **Author contributions:** A.N-O. conceived and designed the original research plan and wrote  
29 the manuscript; B.J. performed most of the experimental work; H.O. prepared the figures and  
30 take part in data analysis; K.S. designed primers and performed comparative analysis with  
31 databases, took part in selected experiments; A.B. performed measurements of

32 phytohormones; WO took part in planning and discussing results and helped with performing  
33 experiments.

34

35 **Funding:** This research was supported by the National Science Centre, grant UMO-  
36 2014/13/B/NZ9/02376 and a statutory grant of PBAI-NRI.

37

38 **Abstract**

39 *TaCKX* family genes influence development of wheat plants by specific regulation of  
40 cytokinin content in different organs. However, their detailed role is not known. The  
41 *TaCKX1*, highly and specifically expressed in developing spikes and in seedling roots, was  
42 silenced by RNAi-mediated gene silencing via *Agrobacterium* and the effect of silencing was  
43 investigated in 7 DAP spikes of T<sub>1</sub> and T<sub>2</sub> generations. Various levels of *TaCKX1* silencing in  
44 both generations influence different models of co-expression with other *TaCKX* genes and  
45 parameters of yield-related traits. Only a high level of silencing in T<sub>2</sub> resulted in strong down-  
46 regulation of *TaCKX11* (3), up-regulation of *TaCKX2.1*, 2.2, 5 and 9 (10), and a high yielding  
47 phenotype. This phenotype is characterised by higher spike number, grain number and grain  
48 yield, as well as slightly higher mass of seedling roots, but lower thousand grain weight  
49 (TGW) and slightly lower spike length. Content of most of cytokinin forms in 7 DAP spikes  
50 of silenced T<sub>2</sub> lines increased from 40 to 76% compared to the non-silenced control. The CKs  
51 cross talk with other phytohormones.

52 Each of the tested yield-related traits is regulated by various up- or down-regulated *TaCKX*  
53 genes and phytohormones. Unexpectedly, increased expression of *TaCKX2.1* in silent for  
54 *TaCKX1* T<sub>2</sub> plants up-regulated trans- and cis-zeatin and trans-zeatin glucosides, determining  
55 lower TGW and chlorophyll content in flag leaves but higher grain yield. The coordinated  
56 effect of *TaCKX1* silencing on expression of other *TaCKX* genes, phytohormone levels in 7  
57 DAP spikes and yield-related traits in silenced T<sub>2</sub> lines is presented.

## 58 **Introduction**

59 Wheat (*Triticum aestivum* L.) is the third economically most important crop in the world after  
60 corn and rice and probably the most important in moderate climates. It provides  
61 approximately 20% of human calories and protein (Reynolds and Braun, 2019). The large  
62 genome of this high-yielding species, composed of three (AABBDD) genomes, has been very  
63 challenging for improving traits (Borrill et al., 2019). However, it might be a great reservoir  
64 for further increase of grain productivity (Nadolska-Orczyk et al., 2017). Continuous increase  
65 of wheat production is necessary to feed the rapidly growing world population (Foley et al.,  
66 2011) (<http://iwyp.org/>). Biotechnological tools implemented in the process of increasing  
67 wheat productivity are expected to be beneficial.

68 Cytokinins (CKs) are important regulators of plant growth and development, influencing  
69 many agriculturally important processes (reviewed in Kieber and Schaller, 2018). Most of the  
70 CKs positively regulate cell division and organization of shoot stem cell centres as well as  
71 stimulating the endocycle in roots by auxin-dependent or auxin-independent mechanisms  
72 (Schaller et al., 2014). CKs are also involved in regulation of various developmental and  
73 physiological processes including size and structure during leaf development (Skalak et al.,  
74 2019), delay of senescence (Gan and Amasino, 1997; Lara et al., 2004), apical dominance  
75 (Tanaka et al., 2006), root proliferation (Werner et al., 2001; Werner et al., 2003). This  
76 regulation might occur at the posttranscriptional and/or posttranslational level (Cerny et al.,  
77 2011; Kim et al., 2012) or by modulation of context-dependent chromatin accessibility (Potter  
78 et al., 2018). CKs modulate expression of other genes involved in the control of various  
79 processes including meristem activity, hormonal cross talk, nutrient acquisition, and various  
80 stress responses (Brenner et al., 2012). There is growing evidence on their key role in seed  
81 yield regulation (reviewed by Jameson and Song, 2016). In cereals and grasses an increased  
82 content of CKs has been reported to positively affect sink potential in developing grains (Liu  
83 et al., 2013), maintain leaf chlorophyll status during plant senescence (Zhang et al., 2016) and  
84 grain filling (Panda et al., 2018). Moreover, in wheat the CKs take part in regulation of seed  
85 dormancy (Chitnis et al., 2014).

86 The majority of naturally occurring CKs in plants belong to isoprenoid cytokinins grouping  
87  $N^6$ -(12-isopentenyl) adenine (iP), *trans*-zeatin (tZ), *cis*-zeatin (cZ), and dihydrozeatin (DZ)  
88 derived from tRNA degradation or from isopentenylation of free adenine nucleosides  
89 catalysed by isopentenyltransferase (IPT) or tRNA-IPT. The second, smaller group comprise  
90  $N^6$ -aromatic CKs, represented by benzyladenine (BA) (Sakakibara, 2006). To better

91 characterize their physiological role, CKs are classified into free-base active forms as tZ, cZ  
92 and iP, translocation forms (nucleosides) as tZ-ribosides (tZR), which exhibit a low level of  
93 activity, and sugar conjugates (*O*-glucosides), which are storage and inactivated forms  
94 (Sakakibara, 2006; Bajguz and Piotrowska, 2009).

95 CKs function as local or long-distance regulatory signals, but the mechanisms of their precise  
96 spatial and temporal control are still largely unknown (Brandizzi, 2019). They are produced in  
97 roots as well as in various sites of aerial part of plants (Kudo et al., 2010). The level of CKs in  
98 respective cells and tissues is dependent on many processes including biosynthesis,  
99 metabolism, activation, transport, and signal transduction. Active CKs can be metabolized via  
100 oxidation by cytokinin oxidase/dehydrogenase (CKX) or by activity of glycosyltransferases.  
101 Many reports have demonstrated that the irreversible degradation step by CKX enzyme plays  
102 an important role in regulation of cytokinin level in some cereals: maize (Brugie` re N, 2003),  
103 rice (Ashikari et al., 2005), barley (Zalewski et al., 2010; Zalewski et al., 2014) and wheat  
104 (Song et al., 2012; Zhang et al., 2012; Ogonowska et al., 2019).

105 The level of CKs might be also regulated by transport through the plant. tZ-type CKs are  
106 mainly synthesized in roots and transported apoplastically to shoots, which promote the  
107 growth of the above-ground parts of the plant (Beveridge et al., 1997; Hirose et al., 2008). In  
108 contrast, the iP and cZ type CKs are the major forms found in phloem and are translocated  
109 from shoots to roots (Corbesier et al., 2003; Hirose et al., 2008).

110 The *CKX* gene families in plants show different numbers of genes and various expression  
111 patterns, which are tissue- and organ-specific, suggesting gene-specific functions. Specificity  
112 of expression of 11 *TaCKX* in developing wheat plants were assigned to four groups: highly  
113 specific to leaves, specific to developing spikes and inflorescences, highly specific to roots  
114 and expressed in various levels through all the organs tested (Ogonowska et al., 2019). The  
115 *TaCKX* genes co-operated inside and among organs. Their role in plant productivity has been  
116 described in many plants including model plants and some cereals. Knock-out mutation or  
117 silencing by RNAi of *OsCKX2* in rice significantly increased grain number (Ashikari et al.,  
118 2005). The same effect of elevated grain number, spike number and yield was reported for  
119 RNAi-silenced *HvCKX1* in barley (Zalewski et al., 2010; Zalewski et al., 2012; Zalewski et  
120 al., 2014) and repeated for the same gene under field conditions (Holubova et al., 2018).  
121 Moreover, significantly increased grain number per spike was found as the effect of the  
122 *TaCKX2.4* gene silenced by RNAi (Li et al., 2018). Knock-out mutation of *HvCKX1* by  
123 CRISPR/Cas9 editing had a limited effect on yield productivity (Gasparis et al., 2019) or no

124 yield data were supplied (Holubova et al., 2018). However, the results were contradictory for  
125 root growth. In the first report, by Gasparis et al. (2019), knock-out *ckx1* mutants showed  
126 significantly decreased CKX enzyme activity in young spikes and 10-day old roots, which  
127 corresponded to greater root length, increased surface area, and greater numbers of root hairs.  
128 In the second report, by Holubova et al. (2018), root growth in *Hvckx1* mutant plants was  
129 reduced, which was similar to knock-out mutants of *ckx3* showing smaller roots (Gasparis et  
130 al., 2019). The role of other *TaCKX* genes in wheat was analysed based on natural *TaCKX*  
131 variation. Haplotype variants of *TaCKX6a02* and *TaCKX6-D1* were related to higher filling  
132 rate and grain size (Zhang et al., 2012; Lu et al., 2015). QTL found in recombinant inbred  
133 lines containing a higher copy number of *TaCKX4* was associated with higher chlorophyll  
134 content and grain size (Chang et al., 2015). To arrange the numbering of *TaCKX* family  
135 genes, a new annotation for the first two was suggested by Ogonowska et al. (2019) based on  
136 the Ensembl Plants database (Kersey et al., 2018) and phylogenetic analysis. *TaCKX6a02* was  
137 annotated as *TaCKX2.1*, *TaCKX6-D1* (JQ797673) was annotated as *TaCKX2.2* and *TaCKX2.4*  
138 was annotated as *TaCKX2.2*. Annotations for these genes were maintained in the recently  
139 published review on the *TaCKX* (Chen et al. 2019), however tested in this research *TaCKX10*  
140 was renamed as *TaCKX9* and *TaCKX3* was renamed as *TaCKX11*. Newly revised by Chen et  
141 al. (2019) naming is applied and former names are in brackets.

142 Due to the size and complexity of the wheat genomes the knowledge about the role of *TaCKX*  
143 genes, containing homoeologues from three genomes, is more difficult to obtain, because of  
144 the limited number of natural mutants. Most homoeologues genes are expected to have  
145 overlapping functions (Uauy, 2006) therefore the effect of gene mutations might be masked  
146 by the other genomes. On average, ~70% of wheat homoeologue triads/triplets (composed of  
147 A, B, and D genome copies) showed balanced expression patterns/the same co-expression  
148 modules (Ramirez-Gonzalez et al., 2018; Takahagi et al., 2018). One solution to silence all of  
149 them is to apply RNAi-mediated gene silencing, which allowed silencing all of the  
150 homoeologues. Moreover, this tool made it possible to obtain a number of lines with different  
151 levels of silencing, which in the case of genes coding proteins of key importance for life  
152 (when lack of protein was correlated with lethality) gave a possibility to regenerate plants for  
153 analysis (Travella et al., 2006). Introduction of a silencing cassette by stable transformation  
154 results in a stable, and inherited to T<sub>4</sub>, effect of silencing (Gasparis et al., 2011; Zalewski et  
155 al., 2014). The applicability of *Agrobacterium*-mediated transformation compared to a  
156 biolistic one for gene silencing of the developmentally regulated gene *HvCKX10* (2) was  
157 proved to be reliable (Zalewski et al., 2012).

158 We present the first report on the role of *TaCKX1* in co-regulation of expression of other  
159 *TaCKX* genes, phytohormone content and their joint participation in regulation of yield-  
160 related traits in wheat. *TaCKX1*, silenced by a hpRNA type of vector via *Agrobacterium*,  
161 showed different levels of silencing in T<sub>1</sub> and T<sub>2</sub>, which has been related to different models  
162 of gene action. The coordinated effect of *TaCKX1* silencing in 7 DAP spikes of T<sub>2</sub> plants on  
163 expression of other *TaCKX* genes, phytohormone levels as well as phenotype based on ratio  
164 indicators is presented. Moreover, models of regulation of phytohormone levels and  
165 phenotypic traits by coordinated expression of *TaCKX* genes based on correlation coefficients  
166 (cc) in non-silenced and silenced wheat plants are proposed.

167

## 168 **Results**

### 169 **Expression levels of silenced *TaCKX1* in segregating T<sub>1</sub> and T<sub>2</sub> plants.**

170 Expression levels of *TaCKX1* were measured in 44 segregating T<sub>1</sub> plants from 8 T<sub>0</sub> PCR+  
171 lines. In 14 T<sub>1</sub> plants relative expression (related to the control = 1.00) ranged from 0.39 to  
172 0.88 with the mean of 0.67 ( $\pm 0.14$ ). In 30 T<sub>1</sub> plants relative expression ranged from 0.90 to  
173 1.52 with the mean of 1.16 ( $\pm 0.18$ ) (Fig. 1 A). The proportion of silenced to non-silenced  
174 plants changed in the T<sub>2</sub> generation. There were 42 silenced from 0.24 to 0.88 plants with the  
175 mean of 0.54 ( $\pm 0.14$ ) and 20 non-silenced plants. Eight of them, with low relative expression  
176 ranging from 0.24 to 0.40 (mean 0.33  $\pm 0.14$ ), and representing different T<sub>1</sub> lines, were  
177 selected for further analysis.

### 178 **Co-expression of silenced *TaCKX1* with other *TaCKX* genes in T<sub>1</sub> and T<sub>2</sub> and CKX 179 enzyme activity.**

180 Mean relative expression of *TaCKX1* in the selected 8 lines was 0.67 in T<sub>1</sub> and was decreased  
181 to 0.33 in T<sub>2</sub> (Fig. 2). Similarly, in the case of *TaCKX11* (3) related gene expression was 0.81  
182 in T<sub>1</sub> and was decreased to 0.34 in T<sub>2</sub>. Relative expression levels of *TaCKX2.2* and *TaCKX9*  
183 (10) were decreased in T<sub>1</sub> to 0.51 and 0.39 and increased in T<sub>2</sub> slightly above the control  
184 level, to 1.08 and to 1.10 respectively. Mean relative values for *TaCKX2.1* were similar to  
185 control in T<sub>1</sub> (1.05) and slightly increased in T<sub>2</sub> (1.17). Relative expression of *TaCKX5*, which  
186 was in T<sub>1</sub> below the control level (0.84), was significantly increased to 1.82 in T<sub>2</sub>. The relative  
187 values of CKX enzyme activity in both generations were around the control, 1.00.

188 The effect of *TaCKX1* silencing on the levels of expression of selected *TaCKX* genes is  
189 presented by the expression ratio indicator (Table 1), which is a quotient of the mean relative  
190 value in silent per mean relative value in non-silent, control plants. In the case of *TaCKX1* and



191 *TaCKX11* (3), the ratio indicator, significantly decreased in T<sub>1</sub>, was strongly decreased in T<sub>2</sub>.  
 192 The value of the ratio indicator for *TaCKX2.2* was not changed in T<sub>1</sub> compared to the control  
 193 and was only slightly decreased in T<sub>2</sub>. The expression ratio indicator of *TaCKX9* (10),  
 194 strongly decreased to 0.59 in T<sub>1</sub>, rose above the control level (1.15) in T<sub>2</sub>. Already high in T<sub>1</sub>,  
 195 the expression ratio indicator for *TaCKX2.1* (1.22) increased to 1.32 in T<sub>2</sub>.  
 196 Table 1. Effect of *TaCKX1* silencing on expression levels of selected *TaCKX* genes presented  
 197 by expression ratio indicator (mean value in silent/mean value in non-silent, control plants) in  
 198 T<sub>1</sub> and T<sub>2</sub> generations.

| Expression ratio indicator | T <sub>1</sub> (SD) | T <sub>2</sub> (SD) | Effect of <i>TaCKX1</i> silencing T <sub>1</sub> / T <sub>2</sub> |
|----------------------------|---------------------|---------------------|-------------------------------------------------------------------|
| <i>TaCKX1</i> *            | 0.58 (0.12)         | 0.28 (0.05)         | decreased / strongly decreased                                    |
| <i>TaCKX11</i> (3)         | 0.80                | 0.36                | decreased / strongly decreased                                    |
| <i>TaCKX2.2</i>            | 1.08                | 0.98                | slightly increased / similar                                      |
| <i>TaCKX9</i> (10)         | 0.59                | 1.15                | strongly decreased / slightly increased                           |
| <i>TaCKX2.1</i>            | 1.22                | 1.32                | increased / increased                                             |
| <i>TaCKX5</i>              | 1.00                | 1.08                | the same / similar                                                |
| CKX activity               | 1.01                | 0.99                | the same / the same                                               |

199  
 200 Phenotype ratio indicator (mean value in silent/mean value in non-silent, control plants) for  
 201 CKX enzyme activity was 1.01 in T<sub>1</sub> and 0.99 in T<sub>2</sub>. Enzyme activity was not affected by the  
 202 level of *TaCKX1* expression/silencing.

203 In T<sub>1</sub> segregating plants CKX enzyme activity significantly correlated with spike length (0.51;  
 204 n=16) and grain weight (0.50; n=16), but in T<sub>2</sub> these correlations were not significant.

205 **Influence of *TaCKX1* silencing on phenotypic traits and chlorophyll content in flag**  
 206 **leaves of T<sub>1</sub> and T<sub>2</sub> plants.**

207 The values of phenotypic traits in T<sub>1</sub> plants with slightly decreased relative expression of  
 208 *TaCKX1* (0.67 ±0.14) compared to control plants (1.00) were on the same level in the case of  
 209 plant height and lower for number of spikes, spike length, grain number, and grain yield  
 210 (Table S2). Higher values were obtained for TGW. Data for chlorophyll content measured by  
 211 SPAD in the first spike and the next spikes were similar. All these differences were not  
 212 significant. Opposite results were obtained for some traits in T<sub>2</sub> plants with highly silent  
 213 *TaCKX1* (0.33 ±0.06) compared to the control (1.00) (Table S3). Silent T<sub>2</sub> plants were  
 214 substantially smaller, had a higher number of spikes, number of grains, grain yield, seedling



215 root weight and SPAD values for the next spikes. TGW and spike length were significantly  
216 lower than in control plants.

217 These differences between the slightly silenced T<sub>1</sub> and highly silent T<sub>2</sub> generation are  
218 expressed by comparison of ratio indicators of phenotypic traits in both generations (Fig. 3).  
219 There were no changes in plant height (cm), TGW or spike length in T<sub>1</sub> plants compared to  
220 the control; however, these values were respectively 7%, 10% and 25% lower in T<sub>2</sub> plants.  
221 Opposite phenotype ratio indicators for number of spikes per plant and number of grains per  
222 plant were about 21% and 30% lower in T<sub>1</sub> and 57% and 29% higher in T<sub>2</sub>. These differences  
223 for spike number, grain number and TGW were significant.

224 The levels of expression of *TaCKX1* in 7 DAP spikes of all T<sub>1</sub> significantly correlated with  
225 number of grains, grain weight, spike length and spike number (0.47, 0.39, 0.42 and 0.33  
226 respectively; n=42) and grain weight correlated with enzyme activity (0.33; n=42). The  
227 *TaCKX9 (10)* expression level significantly correlated with grain number (0.51; n=16).  
228 Correlation coefficients among expression of all tested *TaCKX* genes and enzyme activity,  
229 and phenotypic traits in non-silent and highly silent T<sub>2</sub> are included in Table S4 A, B. All  
230 these correlations are graphically presented in Fig. 6 A-H and described in section 6 of  
231 results.

### 232 **Phytohormone content in 7 DAP spikes of T<sub>2</sub>.**

233 tZOGs, which were mainly composed of tZ-*O*-glucoside (tZOG) and tZ-9-glucoside-*O*-  
234 glucoside (tZ9GOG), were the most abundant cytokinin group in 7 DAP spikes (Fig. 4 A).  
235 Their mean content in control plants was 861.18 and 452.43 ng/g biomass and in silent T<sub>2</sub> was  
236 953.86 and 974.1 ng/g biomass respectively. The second most abundant was tZ with the level  
237 of 119 ng/g biomass in the control and about twice as high in silent T<sub>2</sub> (230). The next was  
238 *cis*-zeatin *O*-glucoside cZOG, which was more abundant in the control than the groups of  
239 silent plants, and the content was 63.48 and 28.68 ng/g biomass respectively. Opposite to  
240 cZOG but similar to tZ, cZ was less abundant in control (29.03 ng/g biomass) but more than  
241 three times more abundant in silent (51.03 ng/g biomass) T<sub>2</sub> plants. Concentration of DZGs  
242 (sum of DZ7G, DZOG and DZOGR) was higher in silent (29 ng/g biomass) than in control  
243 plants (21 ng/g biomass). Very low concentrations (below 0.5 ng/g biomass) were measured  
244 for iP and BA. Concentration of IAA was comparable in control and in silent plants (14.26  
245 and 14.88 ng/g biomass respectively). In the case of ABA, the low concentration in the  
246 control was slightly decreased in silent plants (2.61 and 2.29 ng/g biomass respectively).

247 Concentration of GA was increased from 2.81 ng/g biomass in the control to 29.26 ng/g  
248 biomass in silent plants, which was more than a 10-fold increase.

249 Most of the phytohormone ratio indicators in the group of six silent T<sub>2</sub> plants (Fig. 4 B) were  
250 much higher than in control plants. There were the following cytokinins: tZ (1.53), tZ9GOG  
251 (2.15), tZOG (1.11), cZ (1.76), sum of DZGs (1.40) and iP (1.32). The ratio indicators for  
252 some of them were significantly lower, as in the case of BA (0.27) and cZOG (0.45). Similar  
253 values were observed for IAA, slightly lower for ABA (0.88), but much higher for GA  
254 (10.42).

### 255 **Coordinated effect of *TaCKX1* silencing on expression of other *TaCKX* genes and** 256 **phytohormone level in 7 DAP spikes as well as phenotype in T<sub>2</sub>.**

257 A graphic presentation of the coordinated effect of *TaCKX1* silencing on expression of other  
258 *TaCKX* genes and phytohormone levels in 7 DAP spikes as well as the phenotype of T<sub>2</sub> plants  
259 is presented in Fig. 5. The significant decrease of expression of *TaCKX1* was coordinated  
260 with the significant decrease of *TaCKX11* (3), which presumably resulted in a significant  
261 increase of most CKs: tZ, tZGs, cZ, DZGs, iP as well as GA. The increased phytohormone  
262 level in the first 7 DAP spike positively influenced traits such as spike number and grain  
263 number, reaching the ratio indicators 1.57 and 1.29, respectively, and negatively TGW (0.78),  
264 spike length (0.86), plant height (0.93) and flag leaf senescence (0.95). Opposite data were  
265 obtained for *TaCKX2.1* and *TaCKX9* (10), which showed increased expression in silenced, 7  
266 DAP spikes (1.32 and 1.15 respectively). This might have influenced the decreased ratio  
267 indicators for phytohormones – cZOG (0.45), BA (0.27) and ABA content (0.88) – and  
268 slightly increased ratio indicators for yield-related traits: root weight and grain yield (1.07 and  
269 1.03 respectively). Expression ratio indicators for *TaCKX5* and *TaCKX2.2* were both close to  
270 1.00, but their expression significantly increased compared to T<sub>1</sub> and positively correlated  
271 with the expression of *TaCKX2.1* and *TaCKX9* (10) respectively.

### 272 **Models of co-regulation of phytohormone levels and phenotype traits by coordinated** 273 **expression of *TaCKX* genes in non-silenced and silenced T<sub>2</sub> plants**

274 Two different models of co-regulation of *TaCKX* expression and phenotypic traits in non-  
275 silenced and silenced plants of the T<sub>2</sub> generation are proposed (Fig. 6 A-H) based on  
276 correlation coefficients (Table S4 A, B).

277 Plant height (Fig. 6 A). There was no correlation between plant height and expression values  
278 of any *TaCKX* expressed in 7 DAP spikes of non-silent as well as silent plants. In the first  
279 group of plants this trait negatively correlated with BA and positively with IAA and GA

280 content. By contrast, in silent plants the values of plant height were negatively correlated with  
281 growing concentration of tZ and tZGs, which resulted in a smaller plant phenotype.

282 Spike length (Fig. 6 B) in non-silent plants was positively correlated with cZOG, and  
283 negatively with ABA content. These correlations determined longer spikes and the trait  
284 negatively correlated with spike number and grain number. A strong positive correlation  
285 between CKX activity and spike length was noted in silent plants. The values of enzyme  
286 activity correlated positively with slightly increased *TaCKX5* expression, which negatively  
287 correlated with increasing content of cZ. Spike length in silent plants was positively  
288 correlated with grain yield.

289 TGW (Fig. 6 C). There was no correlation of TGW with expression of any *TaCKX* expressed  
290 in 7 DAP spikes of non-silent plants; however, the trait was strongly negatively correlated  
291 with tZ and cZ content and positively with GA. The grains in this group of plants were larger  
292 and TGW higher. By contrast, in silent plants there was a strong negative correlation of the  
293 trait with growing expression of *TaCKX2.1*, which positively regulated tZ, tZGs, cZ and iP,  
294 but negatively GA content. Moreover, the values of expression of down-regulated *TaCKX11*  
295 (3) negatively correlated with growing content of tZGs and iP and positively with the trait.  
296 Altogether it resulted in lower TGW compared to non-silenced plants. The trait in silent  
297 plants was strongly and positively correlated with grain yield (0.82) and root weight (0.77).

298 Grain yield (Fig. 6 D). Expression levels of *TaCKX1*, *TaCKX2.2* and *TaCKX5* in non-silent  
299 plants positively correlated with iP and negatively with BA content. However, expression of  
300 *TaCKX11* (3) and *TaCKX2.1* negatively regulates tZGs. Altogether it resulted in lower grain  
301 yield comparing to silenced plants, and the trait was strongly positively correlated with spike  
302 number (0.93) and grain number (0.99). Increasing expression of *TaCKX2.1* positively  
303 correlated with growing content of tZGs and cZ and negatively with the trait in silent plants.  
304 Decreasing expression of *TaCKX11* (3), which was positively correlated with decreased  
305 cZOG content and negatively with GA content, positively correlated with the trait. Moreover,  
306 a positive correlation was observed between CKX activity and grain yield in this group of  
307 plants, which was higher than in non-silent plants. The trait was strongly correlated with  
308 TGW (0.82) and root weight (0.66).

309 Spike number (Fig. 6 E) and grain number (Fig. 6 F) in non-silenced plants were positively  
310 regulated by *TaCKX1*, *TaCKX2.2* and *TaCKX5*, and their expression was positively correlated  
311 with iP and negatively with BA. On the other hand, expression levels of *TaCKX2.1* plus  
312 *TaCKX11* (3) were negatively correlated with the traits as well as with iP and positively with

313 BA. Both groups of genes finally affected lower spike and grain number in non-silent  
314 comparing to silent plants and were strongly and positively correlated with each other (0.91)  
315 and grain yield (0.93 and 0.99 respectively). In silent plants decreasing expression of *TaCKX1*  
316 is negatively correlated with both spike and grain number and the gene negatively regulates  
317 decreasing BA content. In the case of grain number, the main player positively correlated with  
318 the trait is *TaCKX5*, increased expression of which was correlated with slightly higher IAA  
319 content, which resulted in higher grain number. Spike number is also positively regulated by  
320 *TaCKX5* co-expressed with *TaCKX2.1*, and both genes were positively correlated with  
321 growing CKs, DZGs and iP as well as GA, determining higher spike number. Both traits are  
322 highly correlated (0.88) with each other.

323 Seedling root weight (Fig. 6 G). There was strong, positive correlation between *TaCKX9 (10)*  
324 expression in 7 DAP spikes and seedling root weight in non-silenced plants, although the  
325 level of expression of the gene did not correlate with any phytohormone content. Moreover,  
326 CKX activity negatively correlated with the trait, which finally resulted in lower root weight.  
327 Decreasing expression of *TaCKX11 (3)* in the case of silent plants was positively correlated  
328 with decreasing content of cZOG and strongly positively correlated with the trait. Increasing  
329 expression levels of *TaCKX9 (10)* plus *TaCKX2.2* negatively correlated with decreasing  
330 content of cZOG and root weight.

331 Chlorophyll content measured by SPAD in flag leaves of first spikes (Fig. 6 H). There was no  
332 correlation between expression level of any *TaCKX* measured in 7 DAP spikes of non-silent  
333 plants and the trait. The only correlations were between phytohormone content and the trait,  
334 positive for tZ and cZ and negative for GA, which resulted in higher SPAD values  
335 (chlorophyll content). Increasing expression of *TaCKX2.1* was strongly positively correlated  
336 with growing values of tZ, tZGs, cZ and DZGs as well as GA in silent plants. A strong  
337 negative correlation was observed between the gene expression and chlorophyll content,  
338 which means that increasing expression of *TaCKX2.1* in 7 DAP spikes results in lower  
339 chlorophyll content in silent plants.

340

## 341 **Discussion**

342 First, 7 DAP spike was chosen as a research objective in wheat since decreased *HvCKX1*  
343 expression at this stage in barley resulted in higher yield due to the higher spike and grain  
344 number (Zalewski et al., 2010; Zalewski et al., 2014). The samples were taken from the  
345 middle part of the spikes, when anthesis starts, in order to ensure a similar developmental

346 stage of spikelets for research. The 7 DAP spikes of wheat represent the middle of cell  
347 division/cell expansion stage (Gao et al., 1992; Hess et al., 2002). The 7-day old embryo is in  
348 the early stage of development, beginning to change from globular to torpedo shape, with the  
349 root pole starting to differentiate and endosperm starting to degenerate ([http://bio-](http://bio-gromit.bio.bris.ac.uk/cerealgenomics/cgi-bin/grain3.pl)  
350 [gromit.bio.bris.ac.uk/cerealgenomics/cgi-bin/grain3.pl](http://bio-gromit.bio.bris.ac.uk/cerealgenomics/cgi-bin/grain3.pl)).

351 The *TaCKX1* gene is an orthologue of *HvCKX1* and both genes are specifically expressed in  
352 developing spikes (Ogonowska et al., 2019). In our earlier research with barley we  
353 hypothesized and continue here to address the hypothesis that the level and pattern of  
354 expression of a defined *CKX* family gene might determine the specific phenotype and indicate  
355 its function (Zalewski et al., 2014).

### 356 **Various levels of *TaCKX1* silencing influence different models of co-expression with** 357 **other *TaCKX* genes and parameters of yield-related traits**

358 One third of segregating T<sub>1</sub> plants showed a decreased expression level of *TaCKX1* between  
359 12% and 61%. Further selection of T<sub>2</sub> led to obtaining plants with much higher, exceeding  
360 60%, silencing of the gene. Different levels of silencing of *TaCKX1* in T<sub>1</sub> and T<sub>2</sub> generate  
361 various results of co-expression with other *TaCKX* genes and plant phenotype. Slightly  
362 decreased expression of *TaCKX1* in T<sub>1</sub> was correlated with slightly decreased expression of  
363 *TaCKX11 (3)* and *TaCKX5* and significantly decreased *TaCKX2.2* and *TaCKX9 (10)*. Highly  
364 decreased expression of *TaCKX1* in T<sub>2</sub> was correlated with highly decreased expression of  
365 *TaCKX11 (3)* and highly increased *TaCKX5*, *TaCKX2.2* and *TaCKX9 (10)*, and expression of  
366 *TaCKX2.1* was on a similar level to the control in T<sub>1</sub> and slightly increased in T<sub>2</sub>. Expression  
367 of *TaCKX9 (10)* was highly and significantly correlated with *TaCKX1* only in T<sub>1</sub>. However, a  
368 new and strong positive correlation between *TaCKX9 (10)* and *TaCKX2.2* in highly silenced  
369 T<sub>2</sub> was observed. Slightly decreased co-expression of silenced *TaCKX1* together with  
370 *TaCKX11 (3)* in T<sub>1</sub> and stronger in T<sub>2</sub> indicate their positive co-regulation. It should be  
371 underlined that there is no homology between the sequence of *TaCKX1* used for silencing and  
372 sequences of other *TaCKX* genes tested; therefore the process of RNAi silencing was  
373 specifically addressed to *TaCKX1* silencing. It indicates that the level of silencing of the  
374 modified gene affected variable levels of expression of the other *TaCKX* genes in a co-  
375 operative process maintaining homeostasis of CKX enzyme in the research object.

376 Transcriptome analysis of knock-out *HvCKX1* in barley (Gasparis et al., 2019) was associated  
377 with down- or up-regulation of other *HvCKX* family genes as well. Besides, models of co-

378 regulation of other *CKX* by highly silenced *TaCKX1* and knock-out *HvCKX1* differ between  
379 these species.

380 The differences in the levels of expression of *TaCKX1* and various co-expression of other  
381 *TaCKX* genes in T<sub>1</sub> and T<sub>2</sub> resulted in opposite phenotypic effects. Since spike number, grain  
382 number and grain yield were reduced in T<sub>1</sub>, representing slightly decreased *TaCKX1*  
383 expression, the same yield-related traits were significantly higher in highly silenced T<sub>2</sub> plants.  
384 High-yielding phenotype occurred when highly silenced *TaCKX1* co-operated with down-  
385 regulated *TaCKX11* (3) but up-regulated *TaCKX5*, *TaCKX2.2*, *TaCKX2.1* and *TaCKX9* (10).  
386 These differences showed that both levels of silencing might be helpful to better understand  
387 the function of developmentally regulated genes. Unexpectedly, changes in expression levels  
388 of co-working *TaCKX* did not result in different enzyme activity, even in highly silenced T<sub>2</sub>  
389 plants. It might be explained that down-regulation of *TaCKX1* and *TaCKX11* (3) is  
390 compensated by up-regulation of *TaCKX2.2*, *TaCKX5* and *TaCKX9* (10), and therefore the  
391 contribution of isozymes encoded by the genes in the general pool of CKX enzyme activity is  
392 the same. Since CKX enzymes indicate different specificities for the particular cytokinin  
393 hormone (Gajdosova et al., 2011), the cytokinin contribution and phenotypic traits of modified  
394 plants were changed accordingly, with consequent differences in the active pool of CKs  
395 influencing phenotype.

396 Schaller et al. (Schaller et al., 2014) listed three possible explanations of differing, positive or  
397 negative regulatory roles of CKs in the process of cell division. The first two are the presence  
398 of additional specific regulators or other signals, which have also been reported by others  
399 (Reid et al., 2016; Mao et al., 2019), and the third possibility is the level of cytokinin activity.  
400 Involvement of additional specific regulators in differentiating the regulatory roles of CKs is  
401 also plausible in our case. However, the most convincing explanation is changed levels of CK  
402 activity (concentrations), which was proved to be significantly increased in silent plants and is  
403 further discussed below.

#### 404 **Co-operating effect of *TaCKX* on the level of active CKs in silenced plants**

405 Since *TaCKX* family genes encode CKX isozymes, which specifically degrade CKs, we might  
406 expect that the consequence of decreased expression of *TaCKX* genes is a decrease of  
407 isozyme activity in the general pool of CKX enzymes, and increased content of active  
408 cytokinins in the respective organ. Therefore according to our diagram (Fig. 5), highly  
409 decreased expression of *TaCKX1* and *TaCKX11* (3) in 7 DAP spikes is expected to result in  
410 the observed increase of most major, active forms of CKs. Already the highest content of



411 tZGs and tZ in non-silenced plants was increased by 45-53% in silenced plants. The third was  
412 cZ, with about ¼ of the content of tZ in non-silenced and increased by 76% in silenced plants.  
413 Conversely, the higher level of cZOG in non-silenced plants was decreased to 45% in  
414 silenced plants. We documented that both tZ and cZ, which are isomers of zeatin, together  
415 with their derivatives are a major group of isoprenoid CKs in 7 DAP spikes. It has already  
416 been shown that trans-zeatin is the predominant form after anthesis (Morris et al. 1993, Hess  
417 et al. 2002), but comprehensive analysis of cytokinins during spike, spikelet, ovule and grain  
418 development has not yet been reported for wheat using LC-MS/MS (Chen et al. 2019).  
419 The content of DZGs increased by 40% in silent compared to non-silent wheat plants,  
420 suggesting that this less known isoprenoid form of CKs might also play an important role in  
421 plant productivity. Interestingly, isoprenoid iP was represented in 7-DAP spikes of non-silent  
422 plants at very low quantities, but its content in 7 DAP spikes of silent plants was increased by  
423 32%. A similar relationship between reduced expression of selected CKX family genes and  
424 cytokinin accumulation in reproductive organs has been observed in other species including  
425 *A. thaliana* (Bartrina et al., 2011), rice (Ashikari et al., 2005) and barley (Holubova et al.,  
426 2018), but detailed data are not comparable to our research in wheat.  
427 The physiological significance of these isoprenoid forms is not very well known. In maize  
428 plants iP and tZ are the most abundant and are susceptible to CKX enzyme (Bilyeu et al.,  
429 2001). DZ, which generally occurs in small quantities, is biologically stable and resistant to  
430 CKX. cZ was found to be less active and more stable than tZ and iP because of its low affinity  
431 to CKX (Bilyeu et al., 2001). Also many other researchers indicate tZ as a bioactive  
432 cytokinin, whereas cZ was reported to have a weak biological impact and unknown biological  
433 role (Schafer et al., 2015). According to Gajdosova et al. (2011), cis-Z-type CKs are frequent  
434 in the developmental stages, where they are associated with limited growth, although the  
435 metabolic fate of both cZ and tZ varied between different species. In addition, cZ levels  
436 change significantly during development in maize grain, as well as in shoot and root tissues  
437 (Saleem et al., 2010; Zalabak et al., 2014). The high levels of cZ at the first developmental  
438 stage of barley spike observed by Powell et al. (Powell et al., 2013) might indicate a possible  
439 role of this form in early barley embryo development. A significant increase of active cZ was  
440 also observed in 7 DAP spikes representing early stages of embryo development in our  
441 research and was negatively correlated with some yield-related traits such as higher grain  
442 yield and root mass and shorter spike length and lower TGW (discussed further below).



443 The BA is represented in 7-DAP spikes of wheat at trace amounts but their content was  
444 significantly decreased in silent plants. However, their correlations with the *TaCKX* genes as  
445 well as yield-related traits of non-silenced plants indicate their importance (discussed in more  
446 detail below). Interestingly, BA was found to participate in posttranscriptional and/or  
447 posttranslational regulation of protein abundance in *Arabidopsis*, showing high specificity to  
448 shoots and roots, and affected differential regulation of hormonal homeostasis (Zd'arska et al.,  
449 2013).

#### 450 **Cross talk of CKs with other phytohormones**

451 Negative correlations between ABA content and *TaCKX2.2* and *TaCKX9 (10)* expression, and  
452 positive with *TaCKX11 (3)*, were associated with a slight decrease of ABA content in 7 DAP  
453 spikes of silenced plants. Moreover, ABA was strongly positively correlated with BA. The  
454 main auxin, IAA, remained at the same level. A ten-fold increase of GA content in silenced  
455 comparing to non-silenced plants was observed.

456 Such cross regulation of CKs and other plant hormones is documented in other species. In  
457 maize kernels the *CKX1* gene is up-regulated by cytokinin and ABA, and abiotic stress  
458 (Brugie`re N, 2003). In tobacco altered cytokinin metabolism affected cytokinin, auxin, and  
459 ABA contents in leaves and chloroplasts (Polanska et al., 2007), which host the highest  
460 proportion of CK-regulated proteins (Cerny et al., 2013). Moreover, auxin, ABA and  
461 cytokinin are involved in the hormonal control of nitrogen acquisition and signalling (Kiba et  
462 al., 2011), which often limits plant growth and development. All four phytohormones CKs,  
463 GA, IAA and ABA were found to be involved in regulation of grain development in drought  
464 conditions (Abid et al., 2017). Moreover, in shoots, BA up-regulated the abundance of  
465 proteins involved in ABA biosynthesis and the ABA response, whereas in the roots, BA  
466 strongly up-regulated the majority of proteins in the ethylene biosynthetic pathway (Zd'arska  
467 et al., 2013). We proved that IAA, GA and ABA contents are also co-regulated by CKs in  
468 non-silenced and silenced 7 DAP spikes. Up-regulation of major CKs and down-regulation of  
469 some minor ones in silent plants influence GA, ABA and IAA content in a similar manner as  
470 in abiotic stress conditions.

#### 471 **Coordinated effect of *TaCKX* gene expression on the content of CKs, other 472 phytohormones and yield-related traits**

473 Plant height in non-silenced plants is down-regulated by BA and up-regulated by IAA and  
474 GA content in the first 7 DAP spikes, resulting in taller plants. Oppositely, increased content  
475 of tZ and tZGs negatively correlated with the trait in silent plants, and therefore increase of

476 these main CKs in developing spikes negatively stimulated plant height. Since expression of  
477 genes was measured in 7 DAP spikes, none of the individual genes was shown to regulate the  
478 trait.

479 As it was proved by Brenner and Schmulling (Brenner and Schmulling, 2012) and similarly to  
480 our results, plant height and root weight are regulated by CKs and IAA in opposite ways. It  
481 may be dependent on basipetal auxin flow in the stem, which suppresses axillary bud  
482 outgrowth, and similarly as in pea, auxin derived from a shoot apex suppresses the local level  
483 of CKs in the nodal stem through the regulation of *CKX* or *IPT* genes (Shimizu-Sato et al.,  
484 2009).

485 The main role in spike length seemed to be played by cZ and its derivatives. Increased content  
486 of cZOG in non-silenced plants negatively correlated with ABA, resulting in longer spikes. In  
487 silent plants the trait is positively regulated by *TaCKX2.2* together with *TaCKX5*, and the  
488 latter is a positive regulator of enzyme activity and negative of cZ content. Consequently  
489 higher content of cZ in 7 DAP spikes led to shorter spikes. cZOG found as positive regulators  
490 of longer spikes are sugar conjugates of cZ-0-glucoside, which are inactivated forms of cZ,  
491 showing metabolic stability against CKX activity (Sakakibara, 2010). The tZ-0-glucosides  
492 hyper-accumulates in *IPT* overexpressing plants (Zubko et al., 2002). 0-glucosylation of cZ is  
493 catalysed by a specific 0-glucotransferase, cisZOG1, discovered in maize (Martin et al.,  
494 2001), and this form mainly functions in the early stages of seed development.

495 Knowledge of function of cZ degradation pathways via the CKX enzyme is limited.  
496 Interestingly, two *Arabidopsis* genes, *CKX1* and *CKX7*, expressed in stages of active growth,  
497 were shown to have high preference for cZ (Gajdosova et al., 2011). Accordingly,  
498 overexpression of *CKX7* highly decreased levels of free cZ in *Arabidopsis* (Kollmer et al.,  
499 2014). In our case relatively low expression of *TaCKX2.2* together with *TaCKX5* led to lower  
500 CKX activity and higher cZ content.

501 None of the tested individual *TaCKX* genes was involved in high TGW in non-silenced  
502 plants, but a negative correlation with tZ and cZ and positive with GA was found. A  
503 significant negative correlation of *TaCKX2.1* and a positive correlation of *TaCKX11 (3)* in  
504 determining low TGW were observed in silenced plants. Unexpectedly increased expression  
505 of the first one positively influenced tZ, tZGs, cZ and iP content and negatively GA content,  
506 and the opposite was true for the second gene, resulting in lower TGW. Therefore both  
507 *TaCKX2.1* and *TaCKX11 (3)*, acting in an opposite manner, maintain homeostasis of CKX  
508 enzyme activity and co-regulate TGW in silenced plants.

509 Greater concentration of CKs, especially tZ, was observed during the grain filling stage of  
510 high-yielding cultivars (Powell et al., 2013). We might suppose that the observed higher  
511 concentrations of tZ and other CKs at the 7 DAP stage, which originally was a consequence  
512 of *TaCKX1* silencing, might accelerate germination of the grains, which resulted in smaller  
513 grains/lower TGW than in non-silenced plants. The silenced *TaCKX1* co-work with down-  
514 regulated *TaCKX11 (3)* in increasing CK content as well as up-regulating *TaCKX2.1*, with  
515 seems to play a regulatory role.

516 The involvement of GA in TGW and other traits demonstrated by us might be the effect of  
517 co-regulation of *CKX* and other gibberellin-responsive genes. One of them is the dwarfing  
518 gene *Rht12*, which can significantly reduce plant height without changing seedling vigour and  
519 substantially increase ear fertility in bread wheat (Chen et al., 2018). Similar results were  
520 obtained with allelic variants of *Ppd-D1* (chromosome 2D) and *Rht-D1* (chromosome 4D)  
521 loci, which affect some plant growth traits, e.g. leaf area and spike length (Guo et al., 2018).  
522 Fahy et al. (Fahy et al., 2018) in their research on starch accumulation suggested that final  
523 grain weight might be largely determined by developmental processes prior to grain filling.  
524 This is in agreement with our observations, in which yield-related traits are differently  
525 regulated in two groups of plants, non-silent and silent. Therefore we might suppose that  
526 coordinated co-regulation of expression of *TaCKX* genes and related CKs takes place during  
527 whole plant and spike development and small seeds in silenced plants are determined at  
528 earlier stages.

529 Grain yield, which is very strongly correlated with grain and spike number in non-silent  
530 plants but with TGW in silent plants, is a more complex feature. Two groups of genes up-  
531 regulating or down-regulating grain yield in non-silent plants have been found. The first one  
532 includes *TaCKX1*, 2.2 and 5 positively regulating iP and tZGs content but negatively BA. The  
533 second comprises *TaCKX11 (3)* (and 2.1) acting in the opposite way. We might expect that  
534 these genes, which negatively correlate with the trait, are main determinants of lower grain  
535 yield, affected by down-regulation of tZGs and BA. It is worth to mention that *TaCKX5* is  
536 highly expressed in inflorescences and leaves. Higher grain yield was positively regulated by  
537 enzyme activity and both *TaCKX11 (3)* as well as *TaCKX2.1* in silenced plants. Indeed,  
538 correlation of *TaCKX2.1* expression with the trait was negative. However, the gene positively  
539 regulated tZGs and cZ content just like for TGW, which is rather untypical for a gene  
540 encoding a CKX enzyme degrading CKs. Therefore the positive regulation of the main CK

541 content by *TaCKX2.1* observed by us supports its role in regulation of expression of other  
542 genes rather than encoding the CKX isozyme.

543 As observed in barley cultivars, changes in cytokinin form and concentration in developing  
544 kernels correspond with variation in yield (Powell et al., 2013). Interestingly, the authors  
545 observed no peaks and no differences in CKX activity at the particular stages of spike  
546 development, which is in agreement with homeostasis of the pool of isozymes in 7 DAP  
547 spikes of wheat, as suggested by us, which is independent of the level of silencing of *TaCKX1*  
548 but is rather a consequence of co-regulation of expression of other *TaCKX* genes. A similar  
549 effect of increased grain yield, which was a consequence of higher spike and grain number,  
550 was obtained in barley with silenced by RNAi *HvCKX1*, an orthologue of *TaCKX1* (Zalewski  
551 et al., 2010; Zalewski et al., 2014; Holubova et al., 2018). The three CKs measured, cZ, tZ  
552 and iP, were differently regulated in earlier or later, but not precisely defined, stages of spike  
553 development (Holubova et al., 2018); therefore the results of CK contents are not comparable.  
554 Incomparable to the results obtained for RNAi silenced *TaCKX1* and *HvCKX1*, no changes in  
555 yield parameters, including spike and seed number, were observed in mutant lines with  
556 knock-out of *HvCKX1* (Gasparis et al., 2019). These essential phenotypic differences between  
557 RNAi-silenced *TaCKX1* and *HvCKX1* or *HvCKX1* knocked out by CRISPR-Cas9 might be  
558 the result of different processes involved in inactivation of the gene. The first one is regulated  
559 at the posttranscriptional and the second at the transcriptional level. Since CKs might regulate  
560 various developmental and physiological processes at the posttranscriptional level (Cerny et  
561 al., 2011; Kim et al., 2012) or by modulation of context-dependent chromatin accessibility  
562 (Potter et al., 2018), the way of deactivating *TaCKX* function seemed to be important.

563 Spike number and grain number are highly correlated in both non-silent and silent plants and  
564 are regulated by the same groups of *TaCKX* genes as well as phytohormones. The first group  
565 includes *TaCKX1*, 2.2 and 5 positively regulating iP but negatively BA. The second  
566 comprises *TaCKX11 (3)* and 2.1 acting in the opposite way, and homeostasis of these  
567 hormones in non-silenced plants maintains a lower spike number. The main role in controlling  
568 higher spike and grain number in silent plants seemed to be played by *TaCKX2.1* and 5. Their  
569 increased expression determine higher spike and grain number. The higher spike number was  
570 correlated with higher DZGs, iP and GA content. These correlations are not significant  
571 because they were measured in a stage of plant development in which the number of spikes  
572 and seed number have already been set.

573 As reported, the higher spike number was the consequence of a higher tiller number, which  
574 was positively correlated with the content of endogenous zeatin in the field-grown wheat after  
575 exogenous hormonal application (Cai et al., 2018). Moreover, the authors showed that IAA  
576 application inhibited the occurrence of tillers, by changing the ratios of IAA and ABA to  
577 zeatin. Shoot branching might also be dependent on acropetal transport of cytokinin  
578 (Shimizu-Sato et al., 2009).

579 Root weight was positively correlated with *TaCKX9 (10)* expression in 7 DAP spikes of non-  
580 silent plants and, conversely, negatively regulated by increased expression of this gene in  
581 silenced plants. Therefore lower (compared to silent plants) expression of the gene in the  
582 investigated organ determined lower root weight in the first group of plants, but higher in the  
583 second. *TaCKX9 (10)*, which is highly and specifically expressed in leaves (Ogonowska et al.  
584 2019) and showed increased expression in 7 DAP spikes of silent plants, down-regulated  
585 cZOG. The same cZOG was up-regulated by *TaCKX11 (3)*, but expression of this gene in 7  
586 DAP spikes of silent plants is strongly decreased. Both cZ and cZOG are involved in spike  
587 length regulation as well as TGW and grain yield in the group of silenced plants.

588 Since our results are restricted to the 7 DAP spike but are correlated with weight of seedling  
589 roots, we should take into consideration possible action of cytokinin transport and signalling  
590 genes as well as other phytohormones, which take part in hormonal cross-talk to control  
591 regulation of root growth (Pacifici et al., 2015). Accordingly cZ type CKs found as the major  
592 forms in phloem and are translocated from shoots to roots (Corbesier et al., 2003; Hirose et  
593 al., 2008). It is also worth underlining that only *TaCKX2.1* and *2.2* are specifically expressed  
594 in developing spikes. Both *TaCKX9 (10)*, highly and specifically expressed in leaves, and  
595 *TaCKX11 (3)*, expressed in all organs, seemed to regulate seedling roots as well, although in  
596 the opposite manner.

597 The lower plant height and higher root weight observed in the group of silenced plants of  
598 wheat is in agreement with opposed regulation of these traits by CKs and IAA mentioned  
599 above (Brenner and Schmulling 2012). CKs are considered as negative regulators of root  
600 growth, so their reduction causes enhanced root growth (Werner et al., 2010; Mrizova et al.,  
601 2013), while excess of CKs inhibits primary root growth in *Arabidopsis* (Riefler et al., 2006;  
602 Dello Ioio et al., 2012). It was also demonstrated that long-distance, basipetal transport of  
603 cytokinin controls polar auxin transport and maintains the vascular pattern in the root  
604 meristem (Bishopp et al., 2011). Therefore CKs might operate differently in distinct parts of  
605 the plant. The cZOG, represented mainly by inactive cZ-0-glucoside, down-regulated by

606 *TaCKX9* (10) in 7 DAP spikes, was probably up-regulated in seedling roots, resulting in  
607 higher root weight. Content of cZ riboside was proved to be most abundant in the roots of  
608 maize (Veitch et al., 2003). Opposite data, up-regulated content of active cZ in 7 DAP spikes,  
609 might influence down-regulation of this CK in roots. It has been documented that such  
610 suppressing cZ levels mediated by overexpression of *AtCKX7* affected root development in  
611 *Arabidopsis* (Kollmer et al., 2014). Higher weight of seedling root was also obtained by  
612 silencing via RNAi or knock-out via CRISPR/Cas9 of *HvCKX1* in barley plants, as in wheat,  
613 and the trait corresponded with decreased activity of CKX enzyme measured in roots  
614 (Zalewski et al. 2010, Gasparis et al. 2019).

615 Some *CKX* genes might be induced by transcription factors (Reid et al., 2016; Mao et al.,  
616 2019). An important role of some NAC transcription factors in regulation of *TaCKX*  
617 expression and subsequent organ development has also been documented in our not yet  
618 published results. Possible mechanisms of co-regulation of all these genes in the developing  
619 roots of silent and non-silent plants is being further investigated by us.

620 Leaf senescence was determined in the flag leaf of the first spike by measuring chlorophyll  
621 content. The trait was down-regulated by increased *TaCKX2.1* expression in silent plants.  
622 Opposite to the general role of *TaCKX* action, increased expression of the gene does not  
623 down-regulate but up-regulates tZ, tZ derivatives and cZ content in 7 DAP spikes. *TaCKX2.1*  
624 functions in a similar way, by up-regulating tZ, tZ derivatives and cZ in determining lower  
625 TGW and higher grain yield in silent T<sub>2</sub> plants. Lower content of active CKs in the first spikes  
626 of non-silent plants is expected to up-regulate these CKs in flag leaves of these spikes,  
627 maintaining prolonged chlorophyll content. In contrast, higher content of tZ, tZGs, cZ and  
628 DZGs as well as GA in 7 DAP spikes of silent plants is expected to down-regulate CKs in the  
629 flag leaves, accelerating their senescence, which is documented by the results.

630 It was previously demonstrated that level of chlorophyll content in flag leaves is associated  
631 with the senescence process, in which CKs suppress inhibition of senescence (Gan and  
632 Amasino, 1995). During this processes, proteins are degraded and nutrients are re-mobilised  
633 from senescing leaves especially to the developing grains (Gregersen et al., 2008). We might  
634 suppose that slower spike ripening in non-silent plants, which is dependent on lower CK  
635 content in the 7 DAP spike, causes slower flow of micronutrients as well as CKs from flag  
636 leaf to spike. Therefore prolonged chlorophyll content in the flag leaf of the first spike  
637 negatively correlated with TGW but positively with plant height. Opposite data were obtained  
638 for flag leaves of silent plants, in which higher content of CKs in 7 DAP spikes might be the



639 result of faster flow accelerating leaf senescence. Reduced chlorophyll content in flag leaves  
640 of the first spike of silent plants positively correlated with grain yield.

641 The important role of tZ and less active cZ in suppression of senescence was proved in maize  
642 leaves (Behr et al., 2012), and in an oat-leaf assay (Gajdosova et al., 2011). It was also  
643 documented that delayed senescence of wheat stay-green mutant, *tasg1*, at the late filling  
644 stage was related to high cytokinin and nitrogen contents (Wang et al., 2019).

645

## 646 **CONCLUSION**

647 Based on the 7 DAP spike as a research object, we have documented that silencing of  
648 *TaCKX1* by RNAi strongly influenced up- or down-regulation of other *TaCKX* genes, as well  
649 as phytohormone levels and consequently phenotype. This co-regulation is dependent on the  
650 level of silencing of the gene and is independent of cross-silencing of other *TaCKX*.

651 In the general model of regulation of yield-related traits, highly silenced *TaCKX1*, which is  
652 specific for developing spikes, strongly down-regulates *TaCKX11 (3)*, expressed through  
653 different organs of the developing plant. Coordinated action of these genes is expected to lead  
654 to increased contents of tZ, tZGs, cZ and DZGs as well as GA, determining a high-yielding  
655 phenotype. In contrast, up-regulated *TaCKX2.1*, which is specifically expressed in developing  
656 spikes, and *TaCKX9 (10)*, strongly expressed in leaves, might be down-regulators of cZOG.  
657 However, detailed analysis revealed that each tested yield-related trait is regulated by various  
658 up- or down-regulated *TaCKX* genes and phytohormones. Key genes involved in regulation of  
659 grain yield, TGW or root weight in highly silenced plants are *TaCKX2.1* and *TaCKX11 (3)*  
660 acting antagonistically; increased expression of the first one determines growth of tZ, tZ  
661 derivatives and cZ, whereas decreased expression of the second down-regulates content of  
662 cZOG. A key role in determination of the high-yielding phenotype seemed to be played by the  
663 growing content of tZ in 7 DAP spikes, which might accelerate maturation of immature grains  
664 by speeding up nutrient flow from flag leaves. This finally led to reduction of TGW but  
665 enhancement of grain number and yield. The latter traits are the result of a higher spike  
666 number, which is determined in the early stages of plant development.

667

## 668 **Materials and methods**

### 669 **Vector construction**

670 The hpRNA type of silencing cassette was constructed in pBract207

671 (<https://www.jic.ac.uk/technologies/crop-transformation-bract/>). It contains the *Hpt* selection



672 gene under the 35S promoter and cloning sites for the cloning silencing cassette under the Ubi  
673 promoter. The vector is compatible with the Gateway cloning system. For cloning purposes a  
674 coding sequence of *TaCKX1* (NCBI JN128583) 378 codons long was used. In the first step,  
675 the cassette was amplified using: EAC11-F: 5'-  
676 TTGAATTCGACTTCGACCGCGGCGTTTT-3' and EAC12-R: 5'-  
677 TTGAATTCATGTCTTGGCCAGGGGAGAG-3 and cloned into the entry vector  
678 pCR8/GW/TOPO (Invitrogen). In the next step, the cassette was cloned to the destination  
679 Bract7 vector in the Gateway reaction. The presence of the silencing cassette in the vector  
680 was verified by restriction analysis and sequencing. The vector was electroporated into the  
681 AGL1 strain of *Agrobacterium tumefaciens* and used for transformation.

### 682 **Plant material, *Agrobacterium*-mediated transformation and *in-vitro* culture**

683 The spring cultivar of common wheat (*Triticum aestivum* L.) Kontesa was used as a donor  
684 plant for transformation experiments as well as transgenic plants. Seeds were germinated into  
685 Petri dishes for one day at 4°C and then five days at room temperature in the dark. Six out of  
686 ten seedlings from each Petri dish were replanted into pots with soil. The plants were grown  
687 in a growth chamber under controlled environmental conditions with 20°C/18°C day/night  
688 temperatures and a 16 h light/8 h dark photoperiod. The light intensity was 350  $\mu\text{mol} \cdot \text{s}^{-1} \cdot \text{m}^{-2}$ .  
689 *Agrobacterium*-mediated transformation experiments were performed according to our  
690 previously described protocols for wheat (Przetakiewicz et al., 2003; Przetakiewicz et al.,  
691 2004). Putative transgenic plants were regenerated and selected on modified MS media  
692 containing 25 mg l<sup>-1</sup> of hygromycin as a selectable agent.  
693 First, 7 days after pollination (DAP) spikes from T<sub>1</sub>, T<sub>2</sub> and control plants were collected for  
694 RT-qPCR and phytohormone quantification. Only 1/3 of the middle part of each spike was  
695 used for experiments (upper and lower parts were removed).

### 696 **PCR analysis**

697 Genomic DNA was isolated from well-developed leaves of 14-day plants according to the  
698 modified CTAB procedure (Murray and Thompson, 1980) or by using the KAPA3G Plant  
699 PCR Kit (Kapa Biosystems). The PCR for genomic DNA isolated by CTAB was carried out  
700 in a 25 ml reaction mixture using Platinum Taq DNA Polymerase (Invitrogen) and 120 ng of  
701 template DNA. The reaction was run using the following program: initial denaturation step at  
702 94°C for 2 min, 35 cycles of amplification at 94°C for 30 s, 65°C for 30 s, 72°C for 30 s with  
703 a final extension step at 72°C for 5 min. The PCR for genomic DNA isolated by KAPA3G  
704 was carried out in a 50  $\mu\text{l}$  reaction mixture using 1 U of KAPA3G Plant DNA Polymerase and

705 a 0.5 x 0.5 mm leaf fragment. The reaction was run using the following program: initial  
706 denaturation step at 95°C for 3 min, 40 cycles of amplification at 95°C for 20 s, 68°C for 30 s,  
707 72°C for 30s with a final extension step at 72°C for 2 min.

708 Putative transgenic T<sub>0</sub> and T<sub>1</sub> plants were tested with two pairs of specific primers amplifying  
709 a fragment of the *hpt* selection gene. The sequences of the primers for the first pair were:  
710 hygF1 5'-ATGACGCACAATCCCACTATCCT-3' and hygR1 5'-  
711 AGTTCGGTTTCAGGCAGGTCTT-3', and the amplified fragment was 405 bp. The  
712 sequences of the primers for the second pair were: hygF2 5'-GACGGCAATTTTCGATGATG-  
713 3' and hygR2 5'- CCGGTCGGCATCTACTCTAT-3', and the amplified fragment was 205 bp.  
714 Non-transgenic, null segregants were used as a control.

### 715 **RNA extraction and cDNA synthesis**

716 Total RNA from 7 DAP spikes was extracted using TRI Reagent and 1-bromo-3-  
717 chloropropane (BCP) (Sigma-Aldrich) according to the manufacturer's protocol. The purity  
718 and concentration of the isolated RNA were determined using a NanoDrop spectrophotometer  
719 (NanoDrop ND-1000) and the integrity was checked by electrophoresis on 1.5% (w/v)  
720 agarose gels. To remove the residual DNA the RNA samples were treated with DNase I,  
721 RNase-free (Thermo Fisher Scientific). Each time 1 µg of good quality RNA was used for  
722 cDNA synthesis using the RevertAid First Strand cDNA Synthesis Kit (Thermo Fisher  
723 Scientific) following the manufacturer's instructions. The obtained cDNA was diluted 20  
724 times before use in RT-qPCR assays.

### 725 **Quantitative RT-qPCR**

726 RT-qPCR assays were performed for 6 target genes: *TaCKX1* (JN128583), *TaCKX2.1*  
727 (JF293079)/2.2 (FJ648070), *TaCKX11* (3) (JN128585), *TaCKX5* (Lei et al. 2008), *TaCKX9*  
728 (*10*) (JN128591). Primer sequences designed for each gene as well as for the reference gene  
729 are shown in **Table S1**. All real-time reactions were performed in a Rotor-Gene Q (Qiagen)  
730 thermal cycler using 1x HOT FIREPol EvaGreen qPCR Mix Plus (Solis BioDyne), 0.2 µM of  
731 each primer, and 4 µl of 20 times diluted cDNA in a total volume of 10 µl. Each reaction was  
732 carried out in 3 technical replicates at the following temperature profile: 95°C – 15 min initial  
733 denaturation and polymerase activation (95°C – 25 s, 62°C – 25 s, 72°C – 25 s) x 45 cycles,  
734 72°C – 5 min, with the melting curve at 72–99°C, 5 s per step. The expression of *TaCKX*  
735 genes was calculated according to the two standard curves method using *ADP-ribosylation*  
736 *factor* (*Ref 2*) as a normalizer.

737 Relative expression/silencing of *TaCKX1* was related to mean expression of the gene in non-  
738 silenced control plants set as 1.00. Relative expression of other *TaCKX* genes was related to  
739 each tested gene set as 1.00 in non-silenced plants.

740 Statistical analysis was performed using Statistica 13 (StatSoft) software. The normality of  
741 data distribution was tested using the Shapiro-Wilk test. To determine whether the means of  
742 two sets of data of expression levels, phytohormone concentrations, and yield-related traits  
743 between non-silenced and silenced lines are significantly different from each other (for p  
744 value less than  $p < 0.05$ ) Student's t-test or the Mann-Whitney test was applied. Correlation  
745 coefficients were determined using parametric correlation matrices (Pearson's test) or a  
746 nonparametric correlation (Spearman's test).

#### 747 **Quantification of ABA, auxins, cytokinins and GA<sub>3</sub>**

748 Chemicals used for quantification were: the standard of ABA, five standards of auxins: IAA,  
749 indole-3-butyric acid (IBA), indole-3-propionic acid (IPA), 1-naphthaleneacetic acid (NAA),  
750 and 2-phenylacetic acid (PAA); twenty-seven standards of CKs: *tZ*, *trans*-zeatin riboside  
751 (*tZR*), *trans*-zeatin-9-glucoside (*tZ9G*), *trans*-zeatin-7-glucoside (*tZ7G*), *trans*-zeatin-*O*-  
752 glucoside (*tZOG*), *trans*-zeatin riboside-*O*-glucoside (*tZROG*), *trans*-zeatin-9-glucoside-*O*-  
753 glucoside (*tZ9GOG*), *trans*-zeatin-9-glucoside riboside (*tZ9GR*), *cZ*, *cis*-zeatin-riboside  
754 (*cZR*), *cis*-zeatin *O*-glucoside (*cZOG*), *cis*-zeatin 9-glucoside (*cZ9G*), *cis*-zeatin-*O*-glucoside-  
755 riboside (*cZROG*), dihydrozeatin (DZ), dihydrozeatin-riboside (DZR), dihydrozeatin-9-  
756 glucoside (DZ9G), dihydrozeatin-7-glucoside (DZ7G), dihydrozeatin-*O*-glucoside (DZOG),  
757 dihydrozeatin riboside-*O*-glucoside (DZROG), *N*<sup>6</sup>-isopentenyladenine (iP), *N*<sup>6</sup>-  
758 isopentenyladenosine (iPR), *N*<sup>6</sup>-isopentenyladenosine-7-glucoside (iP7G), *para*-topolin (*pT*),  
759 *meta*-topolin (*mT*), *ortho*-topolin (*oT*), 6-benzylaminopurine (6-BAP), and standard of GA<sub>3</sub>  
760 were purchased from OlChemIm (Olomouc, Czech Republic). Methanol (MeOH), acetonitrile  
761 (ACN), water (LC-MS purity), and formic acid (FA) were purchased from Merck KGaA  
762 (Darmstadt, Germany).

763 For the measurement of phytohormones, 200 mg of plant powders were placed into the 2 mL  
764 Eppendorf tubes, suspended in 1 mL of (v/v) 50% ACN and homogenized in a bead mill (50  
765 Hz, 5 min; TissueLyser LT, Qiagen, Germany) using two 5 mm tungsten balls. Then, samples  
766 were homogenized using the ultrasound processor VCX 130 (max. power 130 W, max.  
767 frequency 20 kHz, 5 min) equipped with titanium probe (Sonics & Materials Inc., USA) and  
768 mixed in laboratory shaker (90 rpm, dark, 5°C, 30 min; LC-350, Pol-Eko-Aparatura, Poland).  
769 Samples were centrifuged (9000×g, 5 min; MPW-55 Med. Instruments, Poland) and collected

770 in a glass tube. For quantification of ABA, AXs, CKs and GA<sub>3</sub>, [<sup>2</sup>H<sub>6</sub>](+)-*cis,trans*-ABA (50  
771 ng), [<sup>2</sup>H<sub>5</sub>] IAA (15 ng), [<sup>2</sup>H<sub>6</sub>] iP (50 ng), [<sup>2</sup>H<sub>5</sub>] *tZ* (30 ng), [<sup>2</sup>H<sub>5</sub>]-*tZOG* (30 ng), [<sup>2</sup>H<sub>3</sub>]-DZR (30  
772 ng) and [<sup>2</sup>H<sub>2</sub>] GA<sub>3</sub> (30 ng) were added to samples as internal standards.

773 Prepared extracts were purged using a Waters SPE Oasis HLB cartridge, previously activated  
774 and equilibrated using 1 mL of 100% MeOH, 1 mL water, and 1 mL of (v/v) 50% ACN  
775 (Simura et al., 2018). Then, extracts were loaded and collected to the Eppendorf tubes and  
776 eluted with 1 mL of 30% ACN (v/v). Samples were evaporated to dryness by centrifugal  
777 vacuum concentrator (Eppendorf Concentrator Plus, Germany), dissolved in 50 µL of (v/v)  
778 30% ACN and transferred into the insert vials. Detection of analyzed phytohormones was  
779 performed using an Agilent 1260 Infinity series HPLC system (Agilent Technologies, USA)  
780 including a Q-ToF LC/MS mass spectrometer with Dual AJS ESI source; 10 µL of each  
781 sample was injected on the Waters XSelect C<sub>18</sub> column (250 mm × 3.0 mm, 5 µm), heated up  
782 to 50 °C. Mobile phase A was 0.01% (v/v) FA in ACN and phase B 0.01% (v/v) FA in water;  
783 flow was 0.5 mL min<sup>-1</sup>. Separation of above hormones was done in ESI-positive mode with  
784 the following gradient: 0-8 min flowing increased linearly from 5 to 30% A, 8-25 min 80% A,  
785 25-28 min 100% A, 28-30 min 5% A.

786 For the optimization of MS/MS conditions, the chemical standards of analysed  
787 phytohormones were directly injected to the MS in positive ([M + H]<sup>+</sup>) ion scan modes, then  
788 areas of detected standard peaks were calculated. [M + H]<sup>+</sup> was chosen because of its  
789 significantly better signal-to-noise ratios compared to the negative ion scan modes.

790 Chlorophyll content was measured using a SPAD chlorophyll meter.

791

792

### 793 **SUPPLEMENTAL DATA**

794 Supplemental Table S1 Primer sequences designed for reference gene and each of 6 tested  
795 *TaCKX* genes and amplicon length.

796 Supplemental Table S2 Phenotypic traits and ratio indicator in silent T<sub>1</sub> and not silent, control  
797 plants.

798 Supplemental Table S3 Phenotypic traits and ratio indicator in silent T<sub>2</sub> and not silent, control  
799 plants.

800 Supplemental Table S4 A. B. Correlation coefficients among expression of all tested *TaCKX*  
801 genes and enzyme activity, and phenotypic traits in non-silent (A) and highly silent T<sub>2</sub> plants  
802 (B). \* non-parametric analysis; in bold - significant at p<0.01.

## 803 **ACKNOWLEDGEMENTS**

804 This research was supported by the National Science Centre, grant UMO-  
805 2014/13/B/NZ9/02376 and a statutory grant of PBAI-NRI.

806 We thank Malgorzata Wojciechowska, Izabela Skuza, Agnieszka Glowacka, Dr. Maja  
807 Boczkowska and Agnieszka Onysk for excellent technical assistance.

808

## 809 **FIGURE LEGENDS**

810 Fig. 1 A, B. Relative expression level of silenced *TaCKX1* in segregating T<sub>1</sub> (A) and T<sub>2</sub> (B)  
811 plants. The level of expression is related to the control set as 1.00.

812 Fig. 2. Comparison of means of relative CKX enzyme activity and selected gene expression  
813 levels in T<sub>1</sub> (bars) and T<sub>2</sub> (line) generation of silenced lines. \* - significant at p<0.05; \*\* -  
814 significant at p<0.01.

815 Fig. 3. Comparison of phenotypic effect of silencing of *TaCKX1* in T<sub>1</sub> and T<sub>2</sub> generations  
816 based on ratio indicators. \* - significant at p<0.05; \*\* - significant at p<0.01.

817 Fig. 4 A, B. Phytohormone content (ng/g biomass) measured in the group of control and silent  
818 T<sub>2</sub> plants (A). Phytohormone ratio indicators (mean value in silent per mean value in non-  
819 silent, control plants) in silent T<sub>2</sub> plants (B). \* - significant at p<0.05. Trace amounts (≤ 1.00  
820 ng/g biomass): tZR, tZ7G, cZ9G, cZOGR, DZ9G, iP, iP7G, BA. Not detected: cZR, DZ,  
821 DZR, iPR, IBA, IPA, NAA, PAA.

822 Fig. 5. Graphic presentation of coordinated effect of *TaCKX1* silencing on expression of other  
823 *TaCKX* genes, phytohormone levels as well as phenotype in 7 DAP spikes of T<sub>2</sub> plants based  
824 on ratio indicators. \* – significantly increased comparing to T<sub>1</sub>; ? – expected changes.

825 Fig. 6 A-H. Models of regulation of phytohormone levels and phenotypic traits by  
826 coordinated expression of *TaCKX* genes based on correlation coefficients (cc) in non-silenced  
827 and silenced wheat plants. (cc) – correlation coefficient between expression and trait; bold –  
828 strong, significant correlations at p ≤ 0.05 (above 0.82); gray – from 0.5 to 0.6

829 ↑ – increased; ↓ – decreased; cZOG – cZ-0-glucoside (inactive); tZGs. – mainly tZ-0-  
830 glucoside + tZ-9-glucoside-0-glucoside.

831

832

833



834 **LITERATURE CITED**

835

836 **Abid M, Shao YH, Liu SX, Wang F, Gao JW, Jiang D, Tian ZW, Dai TB** (2017) Pre-  
837 drought priming sustains grain development under post-anthesis drought stress by regulating  
838 the growth hormones in winter wheat (*Triticum aestivum* L.). *Planta* **246**: 509-524

839 **Ashikari M, Sakakibara H, Lin SY, Yamamoto T, Takashi T, Nishimura A, Angeles ER,**  
840 **Qian Q, Kitano H, Matsuoka M** (2005) Cytokinin oxidase regulates rice grain production.  
841 *Science* **309**: 741-745

842 **Bajguz A, Piotrowska A** (2009) Conjugates of auxin and cytokinin. *Phytochemistry* **70**: 957-  
843 969

844 **Bartrina I, Otto E, Strnad M, Werner T, Schmulling T** (2011) Cytokinin regulates the  
845 activity of reproductive meristems, flower organ size, ovule formation, and thus seed yield in  
846 *Arabidopsis thaliana*. *Plant Cell* **23**: 69-80

847 **Behr M, Motyka V, Weihmann F, Malbeck J, Deising HB, Wirsel SGR** (2012)  
848 Remodeling of Cytokinin Metabolism at Infection Sites of *Colletotrichum graminicola* on  
849 Maize Leaves. *Molecular Plant-Microbe Interactions* **25**: 1073-1082

850 **Beveridge CA, Murfet IC, Kerhoas L, Sotta B, Miginiac E, Rameau C** (1997) The shoot  
851 controls zeatin riboside export from pea roots. Evidence from the branching mutant rms4.  
852 *Plant Journal* **11**: 339-345

853 **Bilyeu KD, Cole JL, Laskey JG, Riekhof WR, Esparza TJ, Kramer MD, Morris RO**  
854 (2001) Molecular and biochemical characterization of a cytokinin oxidase from maize. *Plant*  
855 *Physiology* **125**: 378-386

856 **Bishopp A, Lehesranta S, Vaten A, Help H, El-Showk S, Scheres B, Helariutta K,**  
857 **Mahonen AP, Sakakibara H, Helariutta Y** (2011) Phloem-Transported Cytokinin  
858 Regulates Polar Auxin Transport and Maintains Vascular Pattern in the Root Meristem.  
859 *Current Biology* **21**: 927-932

860 **Borrill P, Harrington SA, Uauy C** (2019) Applying the latest advances in genomics and  
861 phenomics for trait discovery in polyploid wheat. *Plant Journal* **97**: 56-72

862 **Brandizzi F** (2019) Divide, expand, differentiate - new insights on plant organ growth  
863 through cytokinin signaling. *Plant Journal* **97**: 803-804

864 **Brenner WG, Ramireddy E, Heyl A, Schmulling T** (2012) Gene regulation by cytokinin in  
865 *Arabidopsis*. *Frontiers in Plant Science* **3**

866 **Brenner WG, Schmulling T** (2012) Transcript profiling of cytokinin action in *Arabidopsis*  
867 roots and shoots discovers largely similar but also organ-specific responses. *BMC Plant*  
868 *Biology* **12**

869 **Brugiere N JS, Hantke S, Zinselmeier C, Roessler J, et al.** (2003) Cytokinin oxidase gene  
870 expression in maize is localized to the vasculare, and is induced by cytokinins, abscisic acid,  
871 and abiotic stress. *Plant Physiology* **132**: 1228-1240

872 **Cai T, Meng XP, Liu XL, Liu TN, Wang H, Jia ZK, Yang DQ, Ren XL** (2018) Exogenous  
873 Hormonal Application Regulates the Occurrence of Wheat Tillers by Changing Endogenous  
874 Hormones. *Frontiers in Plant Science* **9**

875 **Cerny M, Dycka F, Bobalova J, Brzobohaty B** (2011) Early cytokinin response proteins  
876 and phosphoproteins of *Arabidopsis thaliana* identified by proteome and phosphoproteome  
877 profiling. *Journal of Experimental Botany* **62**: 921-937

878 **Cerny M, Kuklova A, Hoehenwarter W, Fragner L, Novak O, Rotkova G, Jedelsky PL,**  
879 **Zakova K, Smehilova M, Strnad M, Weckwerth W, Brzobohaty B** (2013) Proteome and  
880 metabolome profiling of cytokinin action in *Arabidopsis* identifying both distinct and similar

- 881 responses to cytokinin down- and up-regulation. *Journal of Experimental Botany* **64**: 4193-  
882 4206
- 883 **Chang C, Lu J, Zhang HP, Ma CX, Sun GL** (2015) Copy Number Variation of Cytokinin  
884 Oxidase Gene *TaCKX4* Associated with Grain Weight and Chlorophyll Content of Flag Leaf  
885 in Common Wheat. *Plos One* **10**: 15
- 886 **Chen L, Du YY, Lu QM, Chen H, Meng RS, Cui CG, Lu S, Yang Y, Chai YM, Li J, Liu**  
887 **LL, Qu XN, Li H, Mishina K, Yu F, Hu YG** (2018) The Photoperiod-Insensitive Allele  
888 *Ppd-D1a* Promotes Earlier Flowering in *Rht12* Dwarf Plants of Bread Wheat. *Frontiers in*  
889 *Plant Science* **9**
- 890 **Chen L, Zhao J, Song J, Jameson PE** (2019) Cytokinin dehydrogenase: a genetic target for  
891 yield improvement in wheat. *Plant Biotechnology Journal*. doi.org/10.1111/pbi.13305
- 892 **Chitnis VR, Gao F, Yao Z, Jordan MC, Park S, Ayele BT** (2014) After-ripening induced  
893 transcriptional changes of hormonal genes in wheat seeds: the cases of brassinosteroids,  
894 ethylene, cytokinin and salicylic acid. *PLoS One* **9**: e87543
- 895 **Corbesier L, Prinsen E, Jacquard A, Lejeune P, Van Onckelen H, Perilleux C, Bernier**  
896 **G** (2003) Cytokinin levels in leaves, leaf exudate and shoot apical meristem of *Arabidopsis*  
897 *thaliana* during floral transition. *Journal of Experimental Botany* **54**: 2511-2517
- 898 **Dello Ioio R, Galinha C, Fletcher AG, Grigg SP, Molnar A, Willemsen V, Scheres B,**  
899 **Sabatini S, Baulcombe D, Maini PK, Tsiantis M** (2012) A PHABULOSA/Cytokinin  
900 Feedback Loop Controls Root Growth in Arabidopsis. *Current Biology* **22**: 1699-1704
- 901 **Fahy B, Siddiqui H, David LC, Powers SJ, Borrill P, Uauy C, Smith AM** (2018) Final  
902 grain weight is not limited by the activity of key starch-synthesising enzymes during grain  
903 filling in wheat. *Journal of Experimental Botany* **69**: 5461-5475
- 904 **Foley JA, Ramankutty N, Brauman KA, Cassidy ES, Gerber JS, Johnston M, Mueller**  
905 **ND, O'Connell C, Ray DK, West PC, Balzer C, Bennett EM, Carpenter SR, Hill J,**  
906 **Monfreda C, Polasky S, Rockstrom J, Sheehan J, Siebert S, Tilman D, Zaks DPM** (2011)  
907 Solutions for a cultivated planet. *Nature* **478**: 337-342
- 908 **Gajdosova S, Spichal L, Kaminek M, Hoyerova K, Novak O, Dobrev PI, Galuszka P,**  
909 **Klima P, Gaudinova A, Zizkova E, Hanus J, Dancak M, Travnicek B, Pesek B,**  
910 **Krupicka M, Vankova R, Strnad M, Motyka V** (2011) Distribution, biological activities,  
911 metabolism, and the conceivable function of cis-zeatin-type cytokinins in plants. *Journal of*  
912 *Experimental Botany* **62**: 2827-2840
- 913 **Gan SS, Amasino RM** (1995) Inhibition of Leaf Senescence by Autoregulated Production of  
914 Cytokinin. *Science* **270**: 1986-1988
- 915 **Gan SS, Amasino RM** (1997) Making sense of senescence - Molecular genetic regulation  
916 and manipulation of leaf senescence. *Plant Physiology* **113**: 313-319
- 917 **Gao XP, Francis D, Ormrod JC, Bennett MD** (1992) Changes in Cell Number and Cell-  
918 Division Activity during Endosperm Development in Allohexaploid Wheat, *Triticum*  
919 *aestivum* L. *Journal of Experimental Botany* **43**: 1603-1609
- 920 **Gasparis S, Orczyk W, Zalewski W, Nadolska-Orczyk A** (2011) The RNA-mediated  
921 silencing of one of the Pin genes in allohexaploid wheat simultaneously decreases the  
922 expression of the other, and increases grain hardness. *Journal of Experimental Botany* **62**:  
923 4025-4036
- 924 **Gasparis S, Przyborowski M, Kala M, Nadolska-Orczyk A** (2019) Knockout of the  
925 *HvCKX1* or *HvCKX3* Gene in Barley (*Hordeum vulgare* L.) by RNA-Guided Cas9 Nuclease  
926 Affects the Regulation of Cytokinin Metabolism and Root Morphology. *Cells* **8**
- 927 **Gregersen PL, Holm PB, Krupinska K** (2008) Leaf senescence and nutrient remobilisation  
928 in barley and wheat. *Plant Biology* **10**: 37-49



- 929 **Guo ZF, Liu GZ, Roder MS, Reif JC, Ganal MW, Schnurbusch T** (2018) Genome-wide  
930 association analyses of plant growth traits during the stem elongation phase in wheat. *Plant*  
931 *Biotechnology Journal* **16**: 2042-2052
- 932 **Hess JR, Carman JG, Banowitz GM** (2002) Hormones in wheat kernels during embryony.  
933 *Journal of Plant Physiology* **159**: 379-386
- 934 **Hirose N, Takei K, Kuroha T, Kamada-Nobusada T, Hayashi H, Sakakibara H** (2008)  
935 Regulation of cytokinin biosynthesis, compartmentalization and translocation. *Journal of*  
936 *Experimental Botany* **59**: 75-83
- 937 **Holubova K, Hensel G, Vojta P, Tarkowski P, Bergougnoux V, Galuszka P** (2018)  
938 Modification of Barley Plant Productivity Through Regulation of Cytokinin Content by  
939 Reverse-Genetics Approaches. *Frontiers in Plant Science* **9**
- 940 **Jameson PE, Song JC** (2016) Cytokinin: a key driver of seed yield. *Journal of Experimental*  
941 *Botany* **67**: 593-606
- 942 **Kersey PJ, Allen JE, Allot A, Barba M, Boddu S, Bolt BJ, Carvalho-Silva D,**  
943 **Christensen M, Davis P, Grabmueller C, Kumar N, Liu ZC, Maurel T, Moore B,**  
944 **McDowall MD, Maheswari U, Naamati G, Newman V, Ong CK, Paulini M, Pedro H,**  
945 **Perry E, Russell M, Sparrow H, Tapanari E, Taylor K, Vullo A, Williams G, Zadissia A,**  
946 **Olson A, Stein J, Wei SR, Tello-Ruiz M, Ware D, Luciani A, Potter S, Finn RD, Urban**  
947 **M, Hammond-Kosack KE, Bolser DM, De Silva N, Howe KL, Langridge N, Maslen G,**  
948 **Staines DM, Yates A** (2018) Ensembl Genomes 2018: an integrated omics infrastructure for  
949 non-vertebrate species. *Nucleic Acids Research* **46**: D802-D808
- 950 **Kiba T, Kudo T, Kojima M, Sakakibara H** (2011) Hormonal control of nitrogen  
951 acquisition: roles of auxin, abscisic acid, and cytokinin. *J Exp Bot* **62**: 1399-1409
- 952 **Kieber JJ, Schaller GE** (2018) Cytokinin signaling in plant development. *Development* **145**
- 953 **Kim K, Ryu H, Cho YH, Scacchi E, Sabatini S, Hwang I** (2012) Cytokinin-facilitated  
954 proteolysis of *ARABIDOPSIS RESPONSE REGULATOR 2* attenuates signaling output in two-  
955 component circuitry. *Plant Journal* **69**: 934-945
- 956 **Kollmer I, Novak O, Strnad M, Schmulling T, Werner T** (2014) Overexpression of the  
957 cytosolic cytokinin oxidase/dehydrogenase (*CKX7*) from *Arabidopsis* causes specific changes  
958 in root growth and xylem differentiation. *Plant Journal* **78**: 359-371
- 959 **Kudo T, Kiba T, Sakakibara H** (2010) Metabolism and Long-distance Translocation of  
960 Cytokinins. *Journal of Integrative Plant Biology* **52**: 53-60
- 961 **Lara MEB, Garcia MCG, Fatima T, Ehness R, Lee TK, Proels R, Tanner W, Roitsch T**  
962 (2004) Extracellular invertase is an essential component of cytokinin-mediated delay of  
963 senescence. *Plant Cell* **16**: 1276-1287
- 964 **Li YL, Song GQ, Gao J, Zhang SJ, Zhang RZ, Li W, Chen ML, Liu M, Xia XC,**  
965 **Risacher T, Li GY** (2018) Enhancement of grain number per spike by RNA interference of  
966 *cytokinin oxidase 2* gene in bread wheat. *Hereditas* **155**
- 967 **Liu Z, Lv Y, Zhang M, Liu Y, Kong L, Zou M, Lu G, Cao J, Yu X** (2013) Identification,  
968 expression, and comparative genomic analysis of the *IPT* and *CKX* gene families in Chinese  
969 cabbage (*Brassica rapa* ssp. *pekinensis*). *BMC Genomics* **14**: 594
- 970 **Lu J, Chang C, Zhang HP, Wang SX, Sun G, Xiao SH, Ma CX** (2015) Identification of a  
971 Novel Allele of *TaCKX6a02* Associated with Grain Size, Filling Rate and Weight of  
972 Common Wheat. *PLoS One* **10**: e0144765
- 973 **Mao CJ, He JM, Liu LN, Deng QM, Yao XF, Liu CM, Qiao YL, Li P, Ming F** (2019)  
974 *OsNAC2* integrates auxin and cytokinin pathways to modulate rice root development. *Plant*  
975 *Biotechnology Journal*

- 976 **Martin RC, Mok MC, Habben JE, Mok DWS** (2001) A maize cytokinin gene encoding an  
977 O-glucosyltransferase specific to *cis*-zeatin. Proceedings of the National Academy of Sciences  
978 of the United States of America **98**: 5922-5926
- 979 **Mrizova K, Jiskrova E, Vyroubalova S, Novak O, Ohnoutkova L, Pospisilova H, Frebort**  
980 **I, Harwood WA, Galuszka P** (2013) Overexpression of cytokinin dehydrogenase genes in  
981 barley (*Hordeum vulgare* cv. Golden Promise) fundamentally affects morphology and  
982 fertility. PLoS One **8**: e79029
- 983 **Murray MG, Thompson WF** (1980) Rapid Isolation of High Molecular-Weight Plant DNA.  
984 Nucleic Acids Research **8**: 4321-4325
- 985 **Nadolska-Orczyk A, Rajchel IK, Orczyk W, Gasparis S** (2017) Major genes determining  
986 yield-related traits in wheat and barley. Theoretical and Applied Genetics **130**: 1081-1098
- 987 **Ogonowska H, Barchacka K, Gasparis S, Jablonski B, Orczyk W, Dmochowska-Boguta**  
988 **M, Nadolska-Orczyk A** (2019) Specificity of expression of *TaCKX* family genes in  
989 developing plants of wheat and their co-operation within and among organs. Plos One **14**
- 990 **Pacifici E, Polverari L, Sabatini S** (2015) Plant hormone cross-talk: the pivot of root  
991 growth. Journal of Experimental Botany **66**: 1113-1121
- 992 **Panda BB, Sekhar S, Dash SK, Behera L, Shaw BP** (2018) Biochemical and molecular  
993 characterisation of exogenous cytokinin application on grain filling in rice. BMC Plant  
994 Biology **18**
- 995 **Polanska L, Vicankova A, Novakova M, Malbeck J, Dobrev PI, Brzobohaty B, Vankova**  
996 **R, Machackova I** (2007) Altered cytokinin metabolism affects cytokinin, auxin, and abscisic  
997 acid contents in leaves and chloroplasts, and chloroplast ultrastructure in transgenic tobacco.  
998 Journal of Experimental Botany **58**: 637-649
- 999 **Potter KC, Wang J, Schaller GE, Kieber JJ** (2018) Cytokinin modulates context-dependent  
1000 chromatin accessibility through the type-B response regulators. Nature Plants **4**: 1102-1111
- 1001 **Powell AE, Paleczny AR, Olechowski H, Emery RJN** (2013) Changes in cytokinin form  
1002 and concentration in developing kernels correspond with variation in yield among field-grown  
1003 barley cultivars. Plant Physiology and Biochemistry **64**: 33-40
- 1004 **Przetakiewicz A, Karas A, Orczyk W, Nadolska-Orczyk A** (2004) Agrobacterium-  
1005 mediated transformation of polyploid cereals. The efficiency of selection and transgene  
1006 expression in wheat. Cellular & Molecular Biology Letters **9**: 903-917
- 1007 **Przetakiewicz A, Orczyk W, Nadolska-Orczyk A** (2003) The effect of auxin on plant  
1008 regeneration of wheat, barley and triticale. Plant Cell Tissue and Organ Culture **73**: 245-256
- 1009 **Ramirez-Gonzalez RH, Borrill P, Lang D, Harrington SA, Brinton J, Venturini L,**  
1010 **Davey M, Jacobs J, van Ex F, Pasha A, Khedikar Y, Robinson SJ, Cory AT, Florio T,**  
1011 **Concia L, Juery C, Schoonbeek H, Steuernagel B, Xiang D, Ridout CJ, Chalhoub B,**  
1012 **Mayer KFX, Benhamed M, Latrasse D, Bendahmane A, Wulff BBH, Appels R, Tiwari**  
1013 **V, Datla R, Choulet F, Pozniak CJ, Provart NJ, Sharpe AG, Paux E, Spannagl M,**  
1014 **Brautigam A, Uauy C, Sequencing IWG** (2018) The transcriptional landscape of polyploid  
1015 wheat. Science **361**: 662-+
- 1016 **Reid DE, Heckmann AB, Novak O, Kelly S, Stougaard J** (2016) *CYTOKININ*  
1017 *OXIDASE/DEHYDROGENASE3* Maintains Cytokinin Homeostasis during Root and Nodule  
1018 Development in *Lotus japonicus*. Plant Physiology **170**: 1060-1074
- 1019 **Reynolds M, Braun H** (2019) WHEAT BREEDING Benefits to low-input agriculture.  
1020 Nature Plants **5**: 652-653
- 1021 **Riefler M, Novak O, Strnad M, Schmulling T** (2006) Arabidopsis cytokinin receptor  
1022 mutants reveal functions in shoot growth, leaf senescence, seed size, germination, root  
1023 development, and cytokinin metabolism. Plant Cell **18**: 40-54

- 1024 **Sakakibara H** (2006) Cytokinins: Activity, biosynthesis, and translocation. Annual Review  
1025 of Plant Biology **57**: 431–449
- 1026 **Sakakibara H** (2010) Cytokinin biosynthesis and metabolism. 95-114. In: Plant Hormones:  
1027 Biosynthesis, Signal Transduction, Action! 3<sup>rd</sup> Edition. Ed. PJ Davies. Springer
- 1028 **Saleem M, Lamkemeyer T, Schutzenmeister A, Madlung J, Sakai H, Piepho HP,**  
1029 **Nordheim A, Hochholdinger F** (2010) Specification of Cortical Parenchyma and Stele of  
1030 Maize Primary Roots by Asymmetric Levels of Auxin, Cytokinin, and Cytokinin-Regulated  
1031 Proteins. Plant Physiology **152**: 4-18
- 1032 **Schafer M, Brutting C, Meza-Canales ID, Grosskinsky DK, Vankova R, Baldwin IT,**  
1033 **Meldau S** (2015) The role of *cis*-zeatin-type cytokinins in plant growth regulation and  
1034 mediating responses to environmental interactions. Journal of Experimental Botany **66**: 4873-  
1035 4884
- 1036 **Schaller GE, Street IH, Kieber JJ** (2014) Cytokinin and the cell cycle. Current Opinion in  
1037 Plant Biology **21**: 7-15
- 1038 **Shimizu-Sato S, Tanaka M, Mori H** (2009) Auxin-cytokinin interactions in the control of  
1039 shoot branching. Plant Molecular Biology **69**: 429-435
- 1040 **Simura J, Antoniadi I, Siroka J, Tarkowska D, Strnad M, Ljung K, Novak O** (2018)  
1041 Plant Hormonomics: Multiple Phytohormone Profiling by Targeted Metabolomics. Plant  
1042 Physiology **177**: 476-489
- 1043 **Skalak J, Vercruyssen L, Claeys H, Hradilova J, Cerny M, Novak O, Plackova L, Saiz-**  
1044 **Fernandez I, Skalakova P, Coppens F, Dhondt S, Koukalova S, Zouhar J, Inze D,**  
1045 **Brzobohaty B** (2019) Multifaceted activity of cytokinin in leaf development shapes its size  
1046 and structure in Arabidopsis. Plant Journal **97**: 805-824
- 1047 **Song J, Jiang L, Jameson PE** (2012) Co-ordinate regulation of cytokinin gene family  
1048 members during flag leaf and reproductive development in wheat. BMC Plant Biology **12**: 78
- 1049 **Takahagi K, Inoue K, Mochida K** (2018) Gene Co-expression Network Analysis Suggests  
1050 the Existence of Transcriptional Modules Containing a High Proportion of Transcriptionally  
1051 Differentiated Homoeologs in Hexaploid Wheat. Frontiers in Plant Science **9**
- 1052 **Tanaka M, Takei K, Kojima M, Sakakibara H, Mori H** (2006) Auxin controls local  
1053 cytokinin biosynthesis in the nodal stem in apical dominance. Plant J **45**: 1028-1036
- 1054 **Travella S, Klimm TE, Keller B** (2006) RNA interference-based gene silencing as an  
1055 efficient tool for functional genomics in hexaploid bread wheat. Plant Physiology **142**: 6-20
- 1056 **Uauy C** (2006) The high grain protein content gene *Gpc-B1* accelerates senescence and has  
1057 pleiotropic effects on protein content in wheat. Journal of Experimental Botany **57**: 2785-  
1058 2794
- 1059 **Veach YK, Martin RC, Mok DWS, Malbeck J, Vankova R, Mok MC** (2003) *O*-  
1060 glucosylation of *cis*-zeatin in maize. Characterization of genes, enzymes, and endogenous  
1061 cytokinins. Plant Physiology **131**: 1374-1380
- 1062 **Wang WQ, Hao QQ, Wang WL, Li QX, Chen FJ, Ni F, Wang Y, Fu DL, Wu JJ, Wang**  
1063 **W** (2019) The involvement of cytokinin and nitrogen metabolism in delayed flag leaf  
1064 senescence in a wheat stay-green mutant, *tasg1*. Plant Science **278**: 70-79
- 1065 **Werner T, Motyka V, Laucou V, Smets R, Van Onckelen H, Schmulling T** (2003)  
1066 Cytokinin-deficient transgenic Arabidopsis plants show multiple developmental alterations  
1067 indicating opposite functions of cytokinins in the regulation of shoot and root meristem  
1068 activity. Plant Cell **15**: 2532-2550
- 1069 **Werner T, Motyka V, Strnad M, Schmulling T** (2001) Regulation of plant growth by  
1070 cytokinin. Proc Natl Acad Sci U S A **98**: 10487-10492

- 1071 **Werner T, Nehnevajova E, Kollmer I, Novak O, Strnad M, Kramer U, Schmulling T**  
1072 (2010) Root-Specific Reduction of Cytokinin Causes Enhanced Root Growth, Drought  
1073 Tolerance, and Leaf Mineral Enrichment in Arabidopsis and Tobacco. *Plant Cell* **22**: 3905-  
1074 3920
- 1075 **Zalabak D, Galuszka P, Mrizova K, Podlesakova K, Gu RL, Frebortova J** (2014)  
1076 Biochemical characterization of the maize cytokinin dehydrogenase family and cytokinin  
1077 profiling in developing maize plantlets in relation to the expression of cytokinin  
1078 dehydrogenase genes. *Plant Physiology and Biochemistry* **74**: 283-293
- 1079 **Zalewski W, Galuszka P, Gasparis S, Orczyk W, Nadolska-Orczyk A** (2010) Silencing of  
1080 the *HvCKX1* gene decreases the cytokinin oxidase/dehydrogenase level in barley and leads to  
1081 higher plant productivity. *Journal of Experimental Botany* **61**: 1839-1851
- 1082 **Zalewski W, Gasparis S, Boczkowska M, Rajchel IK, Kala M, Orczyk W, Nadolska-  
1083 Orczyk A** (2014) Expression patterns of *HvCKX* genes indicate their role in growth and  
1084 reproductive development of barley. *PLoS One* **9**: e115729
- 1085 **Zalewski W, Orczyk W, Gasparis S, Nadolska-Orczyk A** (2012) *HvCKX2* gene silencing  
1086 by biolistic or *Agrobacterium*-mediated transformation in barley leads to different  
1087 phenotypes. *BMC Plant Biology* **12**: 1-12
- 1088 **Zd'arska M, Zatloukalova P, Benitez M, Sedo O, Potesil D, Novak O, Svacinova J, Pesek  
1089 B, Malbeck J, Vasickova J, Zdrahal Z, Hejatko J** (2013) Proteome Analysis in Arabidopsis  
1090 Reveals Shoot- and Root-Specific Targets of Cytokinin Action and Differential Regulation of  
1091 Hormonal Homeostasis. *Plant Physiology* **161**: 918-930
- Zhang J, Yu GH, Wen WW, Ma XQ, Xu B, Huang BR** (2016) Functional characterization  
and hormonal regulation of the *PHEOPHYTINASE* gene *LpPPH* controlling leaf senescence  
in perennial ryegrass. *Journal of Experimental Botany* **67**: 935-945
- 1092 **Zhang L, Zhao YL, Gao LF, Zhao GY, Zhou RH, Zhang BS, Jia JZ** (2012) *TaCKX6-D1*,  
1093 the ortholog of rice *OsCKX2*, is associated with grain weight in hexaploid wheat. *New  
1094 Phytologist* **195**: 574-584
- 1095 **Zubko E, Adams CJ, Machaekova I, Malbeck J, Scollan C, Meyer P** (2002) Activation  
1096 tagging identifies a gene from *Petunia hybrida* responsible for the production of active  
1097 cytokinins in plants. *Plant Journal* **29**: 797-808  
1098  
1099

A

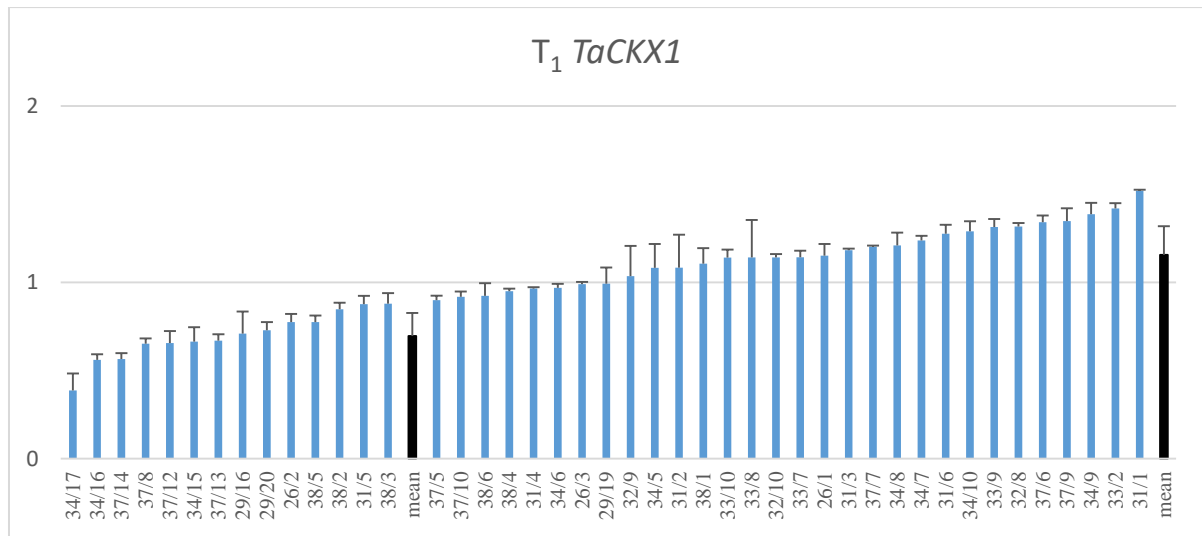

B

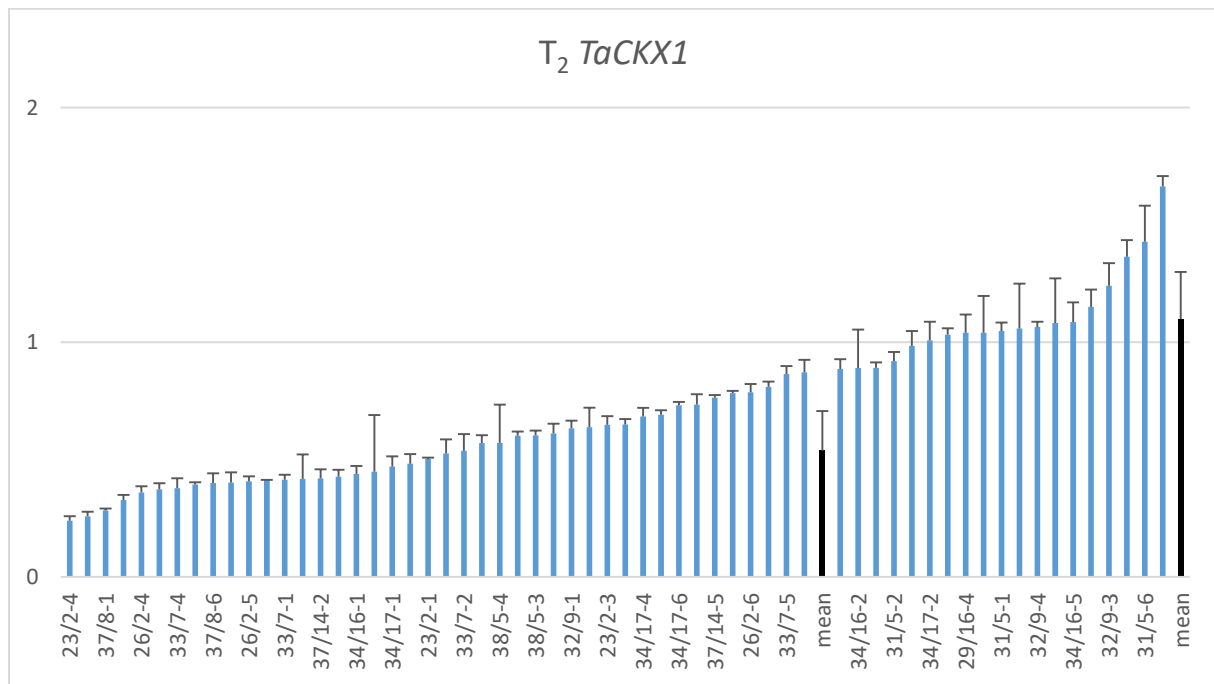

Fig. 1 A. B. Relative expression level of silenced *TaCKX1* in segregating  $T_1$  (A) and  $T_2$  (B) plants. The level of expression is related to the control set as 1.00.

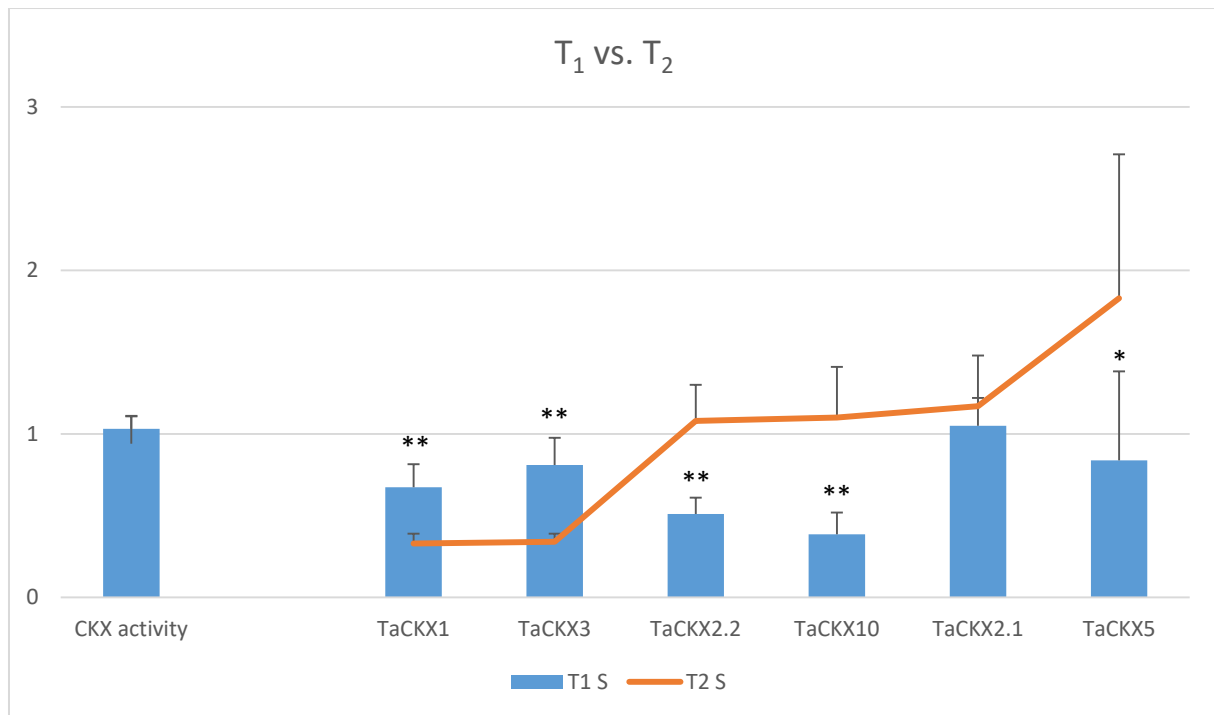

Fig. 2. Comparison of means of relative CKX enzyme activity and selected gene expression levels in T<sub>1</sub> (bars) and T<sub>2</sub> (line) generation of silenced lines. \* - significant at  $p < 0.05$ ; \*\* - significant at  $p < 0.01$ .

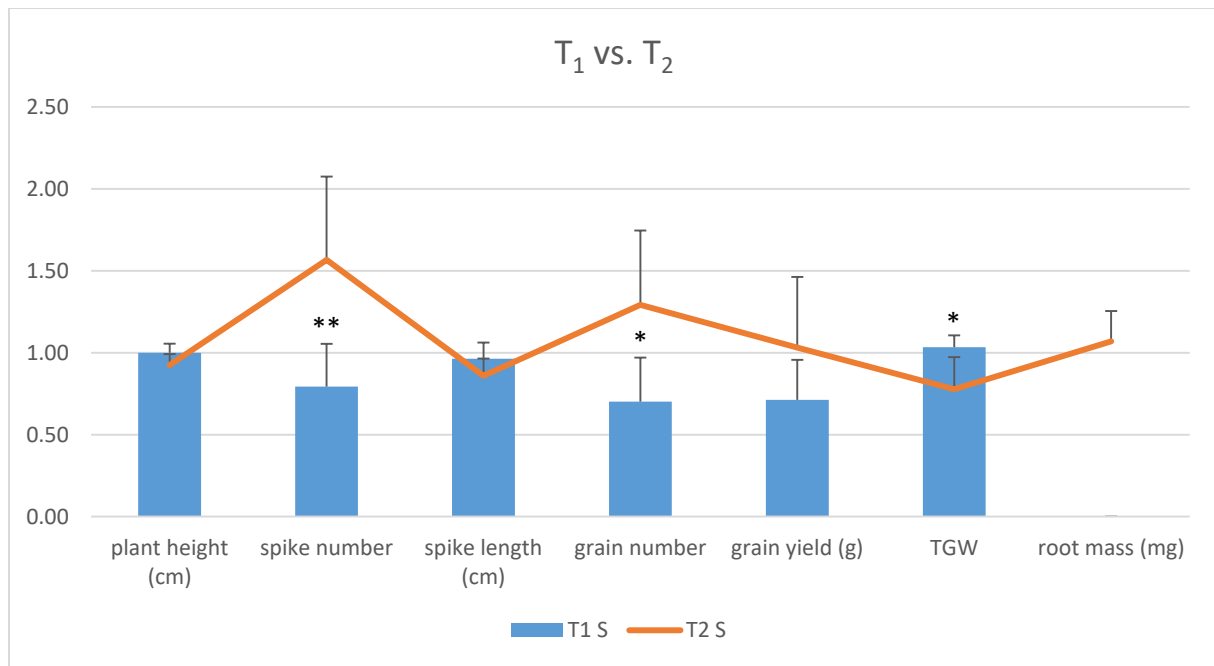

Fig. 3. Comparison of phenotypic effect of silencing of *TaCKX1* in T<sub>1</sub> and T<sub>2</sub> generations based on ratio indicators. \* - significant at p<0.05; \*\* - significant at p<0.01.



A

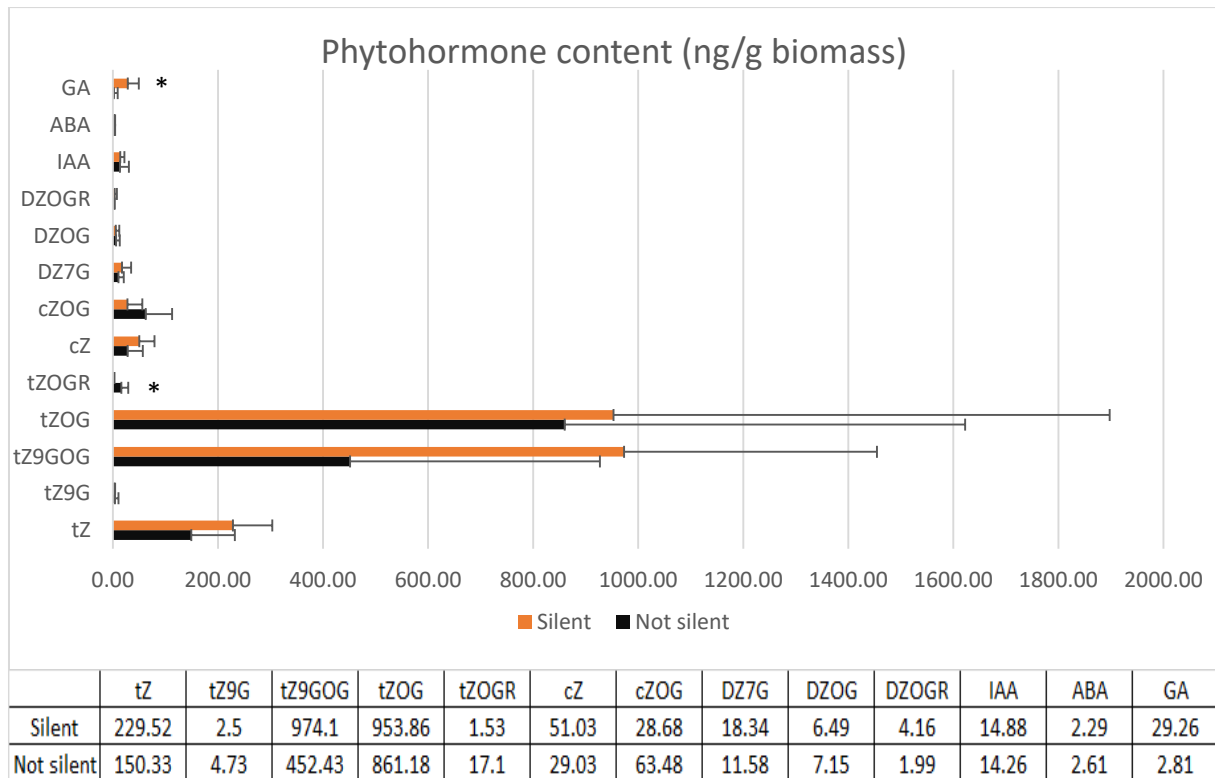

B

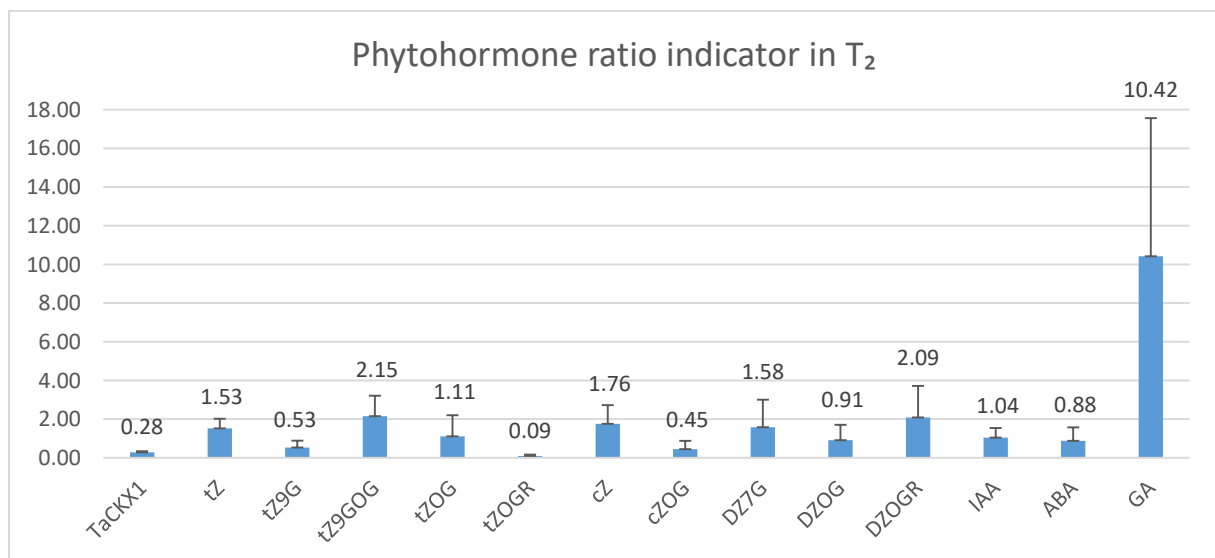

Fig. 4 A. B. Phytohormone content (ng/g biomass) measured in the group of control and silent T<sub>2</sub> plants (A). Phytohormone ratio indicators (mean value in silent per mean value in not silent, control plants) in silent T<sub>2</sub> plants (B). \* - significant at p<0.05. Trace amounts (≤ 1.00 ng/g biomass): tZR, tZ7G, cZ9G, cZOGR, DZ9G, iP, iP7G, BA. Not detected: cZR, DZ, DZR, iPR, IBA, IPA, NAA, PAA.

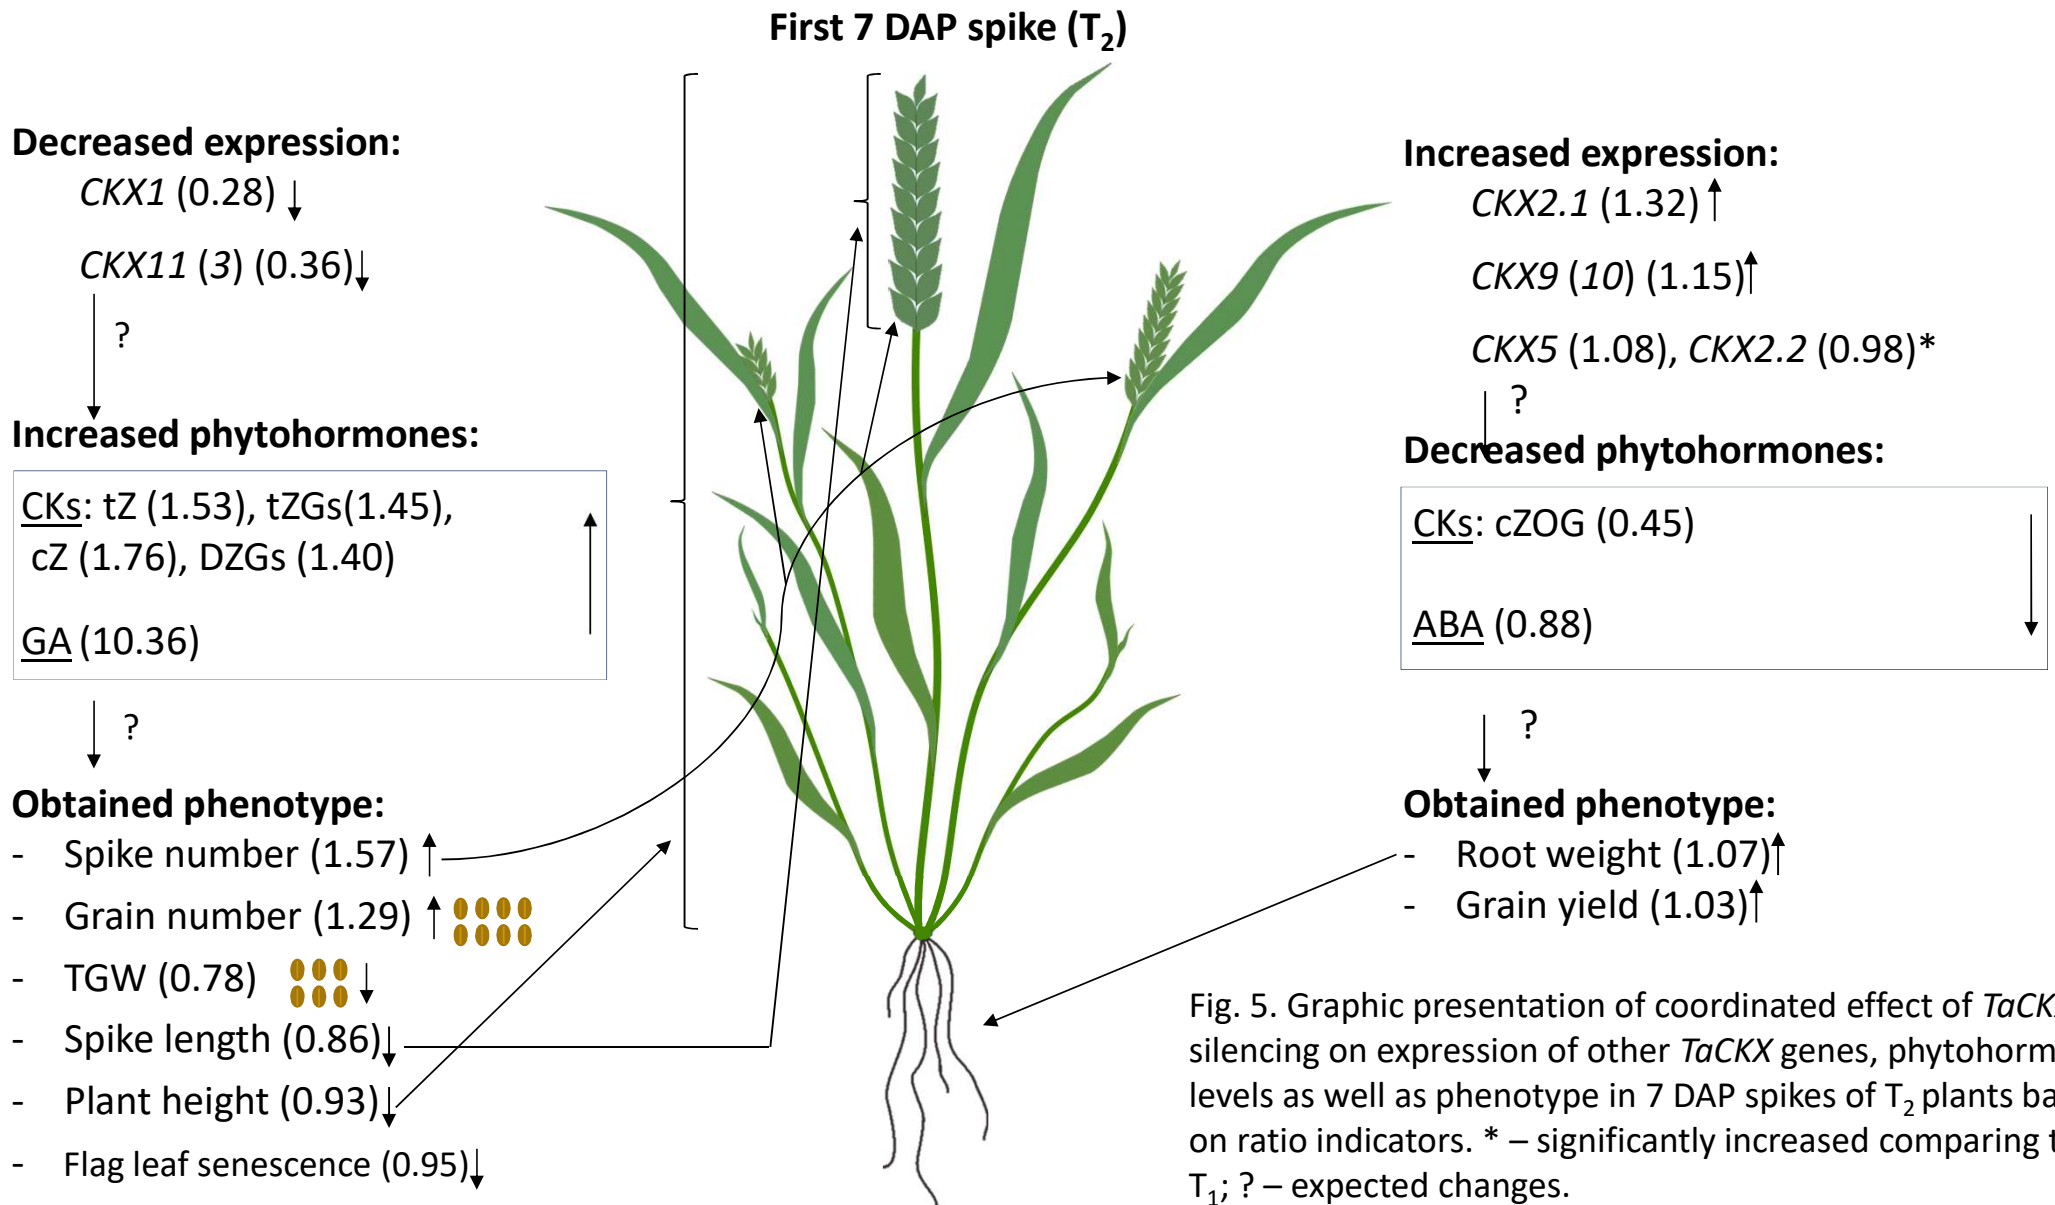

|   | Non-silent                                                                                                                                                                                                                                                                                                                                                                                                                                                          | Observed phenotype                                  | Silent T <sub>2</sub>                                                                                                        |
|---|---------------------------------------------------------------------------------------------------------------------------------------------------------------------------------------------------------------------------------------------------------------------------------------------------------------------------------------------------------------------------------------------------------------------------------------------------------------------|-----------------------------------------------------|------------------------------------------------------------------------------------------------------------------------------|
|   | (cc) expression = phytohormone = expected phenotype                                                                                                                                                                                                                                                                                                                                                                                                                 | Not-silent                                          | Silent                                                                                                                       |
|   | (cc) expression = phytohormone = expected phenotype                                                                                                                                                                                                                                                                                                                                                                                                                 | (cc) expression = phytohormone = expected phenotype | (cc) expression = phytohormone = expected phenotype                                                                          |
| A | <p>bioRxiv preprint doi: <a href="https://doi.org/10.1101/2020.01.07.897421">https://doi.org/10.1101/2020.01.07.897421</a>; this version posted January 8, 2020. The copyright holder for this preprint (which was not certified by peer review) is the author/funder, who has granted bioRxiv a license to display the preprint in perpetuity. It is made available under aCC-BY 4.0 International license.</p> <p>?<br/>- BA<br/>+ IAA<br/>+ GA</p> <p>higher</p> | <p>← Plant height →</p>                             | <p>? - tZ↑, tZGs↑</p> <p>smaller</p>                                                                                         |
| B | <p>?<br/>+ cZOG<br/>- ABA</p> <p>longer</p>                                                                                                                                                                                                                                                                                                                                                                                                                         | <p>← Spike length →</p>                             | <p>(+) CKX2.2 ≈ → ?<br/>(+) CKX5 ≈ → + CKX activity↓ → - cZ↑</p> <p>shorter</p>                                              |
| C | <p>?<br/>- tZ, cZ<br/>+ GA</p> <p>higher</p>                                                                                                                                                                                                                                                                                                                                                                                                                        | <p>← TGW →</p>                                      | <p>(-) CKX2.1↑ → + tZ↑, tZGs↑, cZ↑, iP↑<br/>- GA<br/>(+) CKX11 (3)↓ → - tZGs↑, - iP</p> <p>lower</p>                         |
| D | <p>(+) CKX1, CKX2.2, CKX5 → + iP<br/>- BA<br/>(-) CKX11 (3), CKX2.1 → - tZGs</p> <p>lower</p>                                                                                                                                                                                                                                                                                                                                                                       | <p>← Grain yield →</p>                              | <p>(-) CKX2.1↑ → + tZGs↑, cZ↑<br/>(+) CKX11 (3)↓ → + cZOG↓<br/>- GA↑↑<br/>(+) CKX activity≈</p> <p>higher</p>                |
| E | <p>(+) CKX1, CKX2.2, CKX5 → + iP↓<br/>- BA<br/>(-) CKX2.1, CKX11 (3) → - iP</p> <p>lower</p>                                                                                                                                                                                                                                                                                                                                                                        | <p>← Spike number →</p>                             | <p>(-) CKX1↓ → - BA↓<br/>(+) CKX2.1↑ + CKX5≈ → + DZGs↑, iP↑<br/>+ GA↑↑</p> <p>higher</p>                                     |
| F | <p>(+) CKX1, CKX2.2, CKX5 → + iP<br/>- BA<br/>(-) CKX2.1, CKX11 (3) → + BA<br/>- iP</p> <p>lower</p>                                                                                                                                                                                                                                                                                                                                                                | <p>← Grain number →</p>                             | <p>(-) CKX1↓ → - BA↓<br/>(+) CKX5≈ → + IAA≈</p> <p>higher</p>                                                                |
| G | <p>(+) CKX9 (10) → ?<br/>(-) CKX activity</p> <p>lower</p>                                                                                                                                                                                                                                                                                                                                                                                                          | <p>← Root weight →</p>                              | <p>(+) CKX11 (3)↓ → + cZOG↓<br/>(-) CKX9 (10)↑ → - cZOG↓<br/>(-) CKX2.2≈ → - cZOG↓<br/>(-) CKX2.1↑ → + cZ↑</p> <p>higher</p> |
| H | <p>?<br/>+ tZ, cZ<br/>- GA</p> <p>higher</p>                                                                                                                                                                                                                                                                                                                                                                                                                        | <p>← SPAD 1<sup>st</sup> spike →</p>                | <p>(-) CKX2.1↑ → + tZ↑, tZGs, cZ↑, DZGs↑<br/>+ GA↑↑</p> <p>lower</p>                                                         |

Fig. 6 A-H. Models of regulation of phytohormone levels and phenotypic traits by coordinated expression of *TaCKX* genes based on correlation coefficients (cc) in non-silenced and silenced wheat plants. (cc) – correlation coefficient between expression and trait; bold – strong, significant correlations at  $p < 0.05$  (above 0.82); gray – from 0.5 to 0.6.

## Parsed Citations

**Abid M, Shao YH, Liu SX, Wang F, Gao JW, Jiang D, Tian ZW, Dai TB (2017) Pre-drought priming sustains grain development under post-anthesis drought stress by regulating the growth hormones in winter wheat (*Triticum aestivum* L.). *Planta* 246: 509-524**

Pubmed: [Author and Title](#)

Google Scholar: [Author Only](#) [Title Only](#) [Author and Title](#)

**Ashikari M, Sakakibara H, Lin SY, Yamamoto T, Takashi T, Nishimura A, Angeles ER, Qian Q, Kitano H, Matsuoka M (2005) Cytokinin oxidase regulates rice grain production. *Science* 309: 741-745**

Pubmed: [Author and Title](#)

Google Scholar: [Author Only](#) [Title Only](#) [Author and Title](#)

**Bajguz A, Piotrowska A (2009) Conjugates of auxin and cytokinin. *Phytochemistry* 70: 957-969**

Pubmed: [Author and Title](#)

Google Scholar: [Author Only](#) [Title Only](#) [Author and Title](#)

**Bartrina I, Otto E, Strnad M, Werner T, Schmulling T (2011) Cytokinin regulates the activity of reproductive meristems, flower organ size, ovule formation, and thus seed yield in *Arabidopsis thaliana*. *Plant Cell* 23: 69-80**

Pubmed: [Author and Title](#)

Google Scholar: [Author Only](#) [Title Only](#) [Author and Title](#)

**Behr M, Motyka V, Weihmann F, Malbeck J, Deising HB, Wirsel SGR (2012) Remodeling of Cytokinin Metabolism at Infection Sites of *Colletotrichum graminicola* on Maize Leaves. *Molecular Plant-Microbe Interactions* 25: 1073-1082**

Pubmed: [Author and Title](#)

Google Scholar: [Author Only](#) [Title Only](#) [Author and Title](#)

**Beveridge CA, Murfet IC, Kerhoas L, Sotta B, Miginiac E, Rameau C (1997) The shoot controls zeatin riboside export from pea roots. Evidence from the branching mutant *rms4*. *Plant Journal* 11: 339-345**

Pubmed: [Author and Title](#)

Google Scholar: [Author Only](#) [Title Only](#) [Author and Title](#)

**Bilyeu KD, Cole JL, Laskey JG, Riekhof WR, Esparza TJ, Kramer MD, Morris RO (2001) Molecular and biochemical characterization of a cytokinin oxidase from maize. *Plant Physiology* 125: 378-386**

Pubmed: [Author and Title](#)

Google Scholar: [Author Only](#) [Title Only](#) [Author and Title](#)

**Bishopp A, Lehesranta S, Vaten A, Help H, El-Showk S, Scheres B, Helariutta K, Mahonen AP, Sakakibara H, Helariutta Y (2011) Phloem-Transported Cytokinin Regulates Polar Auxin Transport and Maintains Vascular Pattern in the Root Meristem. *Current Biology* 21: 927-932**

Pubmed: [Author and Title](#)

Google Scholar: [Author Only](#) [Title Only](#) [Author and Title](#)

**Borrill P, Harrington SA, Uauy C (2019) Applying the latest advances in genomics and phenomics for trait discovery in polyploid wheat. *Plant Journal* 97: 56-72**

Pubmed: [Author and Title](#)

Google Scholar: [Author Only](#) [Title Only](#) [Author and Title](#)

**Brandizzi F (2019) Divide, expand, differentiate - new insights on plant organ growth through cytokinin signaling. *Plant Journal* 97: 803-804**

Pubmed: [Author and Title](#)

Google Scholar: [Author Only](#) [Title Only](#) [Author and Title](#)

**Brenner WG, Ramireddy E, Heyl A, Schmulling T (2012) Gene regulation by cytokinin in *Arabidopsis*. *Frontiers in Plant Science* 3**

Pubmed: [Author and Title](#)

Google Scholar: [Author Only](#) [Title Only](#) [Author and Title](#)

**Brenner WG, Schmulling T (2012) Transcript profiling of cytokinin action in *Arabidopsis* roots and shoots discovers largely similar but also organ-specific responses. *BMC Plant Biology* 12**

Pubmed: [Author and Title](#)

Google Scholar: [Author Only](#) [Title Only](#) [Author and Title](#)

**Brugiere N JS, Hantke S, Zinselmeier C, Roessler J, et al. (2003) Cytokinin oxidase gene expression in maize is localized to the vasculature, and is induced by cytokinins, abscisic acid, and abiotic stress. *Plant Physiology* 132: 1228-1240**

Pubmed: [Author and Title](#)

Google Scholar: [Author Only](#) [Title Only](#) [Author and Title](#)

**Cai T, Meng XP, Liu XL, Liu TN, Wang H, Jia ZK, Yang DQ, Ren XL (2018) Exogenous Hormonal Application Regulates the Occurrence of Wheat Tillers by Changing Endogenous Hormones. *Frontiers in Plant Science* 9**

Pubmed: [Author and Title](#)

Google Scholar: [Author Only](#) [Title Only](#) [Author and Title](#)

**Cerny M, Dycka F, Bobalova J, Brzobohaty B (2011) Early cytokinin response proteins and phosphoproteins of *Arabidopsis thaliana* identified by proteome and phosphoproteome profiling. *Journal of Experimental Botany* 62: 921-937**

Pubmed: [Author and Title](#)

Google Scholar: [Author Only](#) [Title Only](#) [Author and Title](#)

**Cerny M, Kuklova A, Hoehenwarter W, Fragner L, Novak O, Rotkova G, Jedelsky PL, Zakova K, Smehilova M, Strnad M, Weckwerth W, Brzobohaty B (2013) Proteome and metabolome profiling of cytokinin action in Arabidopsis identifying both distinct and similar responses to cytokinin down- and up-regulation. Journal of Experimental Botany 64: 4193-4206**

Pubmed: [Author and Title](#)

Google Scholar: [Author Only](#) [Title Only](#) [Author and Title](#)

**Chang C, Lu J, Zhang HP, Ma CX, Sun GL (2015) Copy Number Variation of Cytokinin Oxidase Gene TaCKX4 Associated with Grain Weight and Chlorophyll Content of Flag Leaf in Common Wheat. Plos One 10: 15**

Pubmed: [Author and Title](#)

Google Scholar: [Author Only](#) [Title Only](#) [Author and Title](#)

**Chen L, Du YY, Lu QM, Chen H, Meng RS, Cui CG, Lu S, Yang Y, Chai YM, Li J, Liu LL, Qu XN, Li H, Mishina K, Yu F, Hu YG (2018) The Photoperiod-Insensitive Allele Ppd-D1a Promotes Earlier Flowering in Rht12 Dwarf Plants of Bread Wheat. Frontiers in Plant Science 9**

Pubmed: [Author and Title](#)

Google Scholar: [Author Only](#) [Title Only](#) [Author and Title](#)

**Chen L, Zhao J, Song J, Jameson PE (2019) Cytokinin dehydrogenase: a genetic target for yield improvement in wheat. Plant Biotechnology Journal. doi.org/10.1111/pbi.13305**

Pubmed: [Author and Title](#)

Google Scholar: [Author Only](#) [Title Only](#) [Author and Title](#)

**Chitnis VR, Gao F, Yao Z, Jordan MC, Park S, Ayele BT (2014) After-ripening induced transcriptional changes of hormonal genes in wheat seeds: the cases of brassinosteroids, ethylene, cytokinin and salicylic acid. PLoS One 9: e87543**

Pubmed: [Author and Title](#)

Google Scholar: [Author Only](#) [Title Only](#) [Author and Title](#)

**Corbesier L, Prinsen E, Jacquard A, Lejeune P, Van Onckelen H, Perilleux C, Bernier G (2003) Cytokinin levels in leaves, leaf exudate and shoot apical meristem of Arabidopsis thaliana during floral transition. Journal of Experimental Botany 54: 2511-2517**

Pubmed: [Author and Title](#)

Google Scholar: [Author Only](#) [Title Only](#) [Author and Title](#)

**Dello iorio R, Galinha C, Fletcher AG, Grigg SP, Molnar A, Willemsen V, Scheres B, Sabatini S, Baulcombe D, Maini PK, Tsiantis M (2012) APHABULOSA/Cytokinin Feedback Loop Controls Root Growth in Arabidopsis. Current Biology 22: 1699-1704**

Pubmed: [Author and Title](#)

Google Scholar: [Author Only](#) [Title Only](#) [Author and Title](#)

**Fahy B, Siddiqui H, David LC, Powers SJ, Borrill P, Uauy C, Smith AM (2018) Final grain weight is not limited by the activity of key starch-synthesising enzymes during grain filling in wheat. Journal of Experimental Botany 69: 5461-5475**

Pubmed: [Author and Title](#)

Google Scholar: [Author Only](#) [Title Only](#) [Author and Title](#)

**Foley JA, Ramankutty N, Brauman KA, Cassidy ES, Gerber JS, Johnston M, Mueller ND, O'Connell C, Ray DK, West PC, Balzer C, Bennett EM, Carpenter SR, Hill J, Monfreda C, Polasky S, Rockstrom J, Sheehan J, Siebert S, Tilman D, Zaks DPM (2011) Solutions for a cultivated planet. Nature 478: 337-342**

Pubmed: [Author and Title](#)

Google Scholar: [Author Only](#) [Title Only](#) [Author and Title](#)

**Gajdosova S, Spichal L, Kaminek M, Hoyerova K, Novak O, Dobrev PI, Galuszka P, Klima P, Gaudinova A, Zizkova E, Hanus J, Dancak M, Travnicek B, Pesek B, Krupicka M, Vankova R, Strnad M, Motyka V (2011) Distribution, biological activities, metabolism, and the conceivable function of cis-zeatin-type cytokinins in plants. Journal of Experimental Botany 62: 2827-2840**

Pubmed: [Author and Title](#)

Google Scholar: [Author Only](#) [Title Only](#) [Author and Title](#)

**Gan SS, Amasino RM (1995) Inhibition of Leaf Senescence by Autoregulated Production of Cytokinin. Science 270: 1986-1988**

Pubmed: [Author and Title](#)

Google Scholar: [Author Only](#) [Title Only](#) [Author and Title](#)

**Gan SS, Amasino RM (1997) Making sense of senescence - Molecular genetic regulation and manipulation of leaf senescence. Plant Physiology 113: 313-319**

Pubmed: [Author and Title](#)

Google Scholar: [Author Only](#) [Title Only](#) [Author and Title](#)

**Gao XP, Francis D, Ormrod JC, Bennett MD (1992) Changes in Cell Number and Cell-Division Activity during Endosperm Development in Allohexaploid Wheat, Triticum aestivum L. Journal of Experimental Botany 43: 1603-1609**

Pubmed: [Author and Title](#)

Google Scholar: [Author Only](#) [Title Only](#) [Author and Title](#)

**Gasparis S, Orczyk W, Zalewski W, Nadolska-Orczyk A (2011) The RNA-mediated silencing of one of the Pin genes in allohexaploid wheat simultaneously decreases the expression of the other, and increases grain hardness. Journal of Experimental Botany 62: 4025-4036**

Pubmed: [Author and Title](#)

Google Scholar: [Author Only](#) [Title Only](#) [Author and Title](#)

**Gasparis S, Przyborowski M, Kala M, Nadolska-Orczyk A (2019) Knockout of the HvCKX1 or HvCKX3 Gene in Barley (*Hordeum vulgare* L.) by RNA-Guided Cas9 Nuclease Affects the Regulation of Cytokinin Metabolism and Root Morphology. *Cells* 8**

Pubmed: [Author and Title](#)

Google Scholar: [Author Only](#) [Title Only](#) [Author and Title](#)

**Gregersen PL, Holm PB, Krupinska K (2008) Leaf senescence and nutrient remobilisation in barley and wheat. *Plant Biology* 10: 37-49**

Pubmed: [Author and Title](#)

Google Scholar: [Author Only](#) [Title Only](#) [Author and Title](#)

**Guo ZF, Liu GZ, Roder MS, Reif JC, Ganai MW, Schnurbusch T (2018) Genome-wide association analyses of plant growth traits during the stem elongation phase in wheat. *Plant Biotechnology Journal* 16: 2042-2052**

Pubmed: [Author and Title](#)

Google Scholar: [Author Only](#) [Title Only](#) [Author and Title](#)

**Hess JR, Carman JG, Banowitz GM (2002) Hormones in wheat kernels during embryony. *Journal of Plant Physiology* 159: 379-386**

Pubmed: [Author and Title](#)

Google Scholar: [Author Only](#) [Title Only](#) [Author and Title](#)

**Hirose N, Takei K, Kuroha T, Kamada-Nobusada T, Hayashi H, Sakakibara H (2008) Regulation of cytokinin biosynthesis, compartmentalization and translocation. *Journal of Experimental Botany* 59: 75-83**

Pubmed: [Author and Title](#)

Google Scholar: [Author Only](#) [Title Only](#) [Author and Title](#)

**Holubova K, Hensel G, Vojta P, Tarkowski P, Bergougnoux V, Galuszka P (2018) Modification of Barley Plant Productivity Through Regulation of Cytokinin Content by Reverse-Genetics Approaches. *Frontiers in Plant Science* 9**

Pubmed: [Author and Title](#)

Google Scholar: [Author Only](#) [Title Only](#) [Author and Title](#)

**Jameson PE, Song JC (2016) Cytokinin: a key driver of seed yield. *Journal of Experimental Botany* 67: 593-606**

Pubmed: [Author and Title](#)

Google Scholar: [Author Only](#) [Title Only](#) [Author and Title](#)

**Kersey PJ, Allen JE, Allot A, Barba M, Boddu S, Bolt BJ, Carvalho-Silva D, Christensen M, Davis P, Grabmueller C, Kumar N, Liu ZC, Maurel T, Moore B, McDowall MD, Maheswari U, Naamati G, Newman V, Ong CK, Paulini M, Pedro H, Perry E, Russell M, Sparrow H, Tapanari E, Taylor K, Vullo A, Williams G, Zadissia A, Olson A, Stein J, Wei SR, Tello-Ruiz M, Ware D, Luciani A, Potter S, Finn RD, Urban M, Hammond-Kosack KE, Bolser DM, De Silva N, Howe KL, Langridge N, Maslen G, Staines DM, Yates A (2018) Ensembl Genomes 2018: an integrated omics infrastructure for non-vertebrate species. *Nucleic Acids Research* 46: D802-D808**

Pubmed: [Author and Title](#)

Google Scholar: [Author Only](#) [Title Only](#) [Author and Title](#)

**Kiba T, Kudo T, Kojima M, Sakakibara H (2011) Hormonal control of nitrogen acquisition: roles of auxin, abscisic acid, and cytokinin. *J Exp Bot* 62: 1399-1409**

Pubmed: [Author and Title](#)

Google Scholar: [Author Only](#) [Title Only](#) [Author and Title](#)

**Kieber JJ, Schaller GE (2018) Cytokinin signaling in plant development. *Development* 145**

Pubmed: [Author and Title](#)

Google Scholar: [Author Only](#) [Title Only](#) [Author and Title](#)

**Kim K, Ryu H, Cho YH, Scacchi E, Sabatini S, Hwang I (2012) Cytokinin-facilitated proteolysis of ARABIDOPSIS RESPONSE REGULATOR 2 attenuates signaling output in two-component circuitry. *Plant Journal* 69: 934-945**

Pubmed: [Author and Title](#)

Google Scholar: [Author Only](#) [Title Only](#) [Author and Title](#)

**Kollmer I, Novak O, Strnad M, Schmulling T, Werner T (2014) Overexpression of the cytosolic cytokinin oxidase/dehydrogenase (CKX7) from *Arabidopsis* causes specific changes in root growth and xylem differentiation. *Plant Journal* 78: 359-371**

Pubmed: [Author and Title](#)

Google Scholar: [Author Only](#) [Title Only](#) [Author and Title](#)

**Kudo T, Kiba T, Sakakibara H (2010) Metabolism and Long-distance Translocation of Cytokinins. *Journal of Integrative Plant Biology* 52: 53-60**

Pubmed: [Author and Title](#)

Google Scholar: [Author Only](#) [Title Only](#) [Author and Title](#)

**Lara MEB, Garcia MCG, Fatima T, Ehness R, Lee TK, Proels R, Tanner W, Roitsch T (2004) Extracellular invertase is an essential component of cytokinin-mediated delay of senescence. *Plant Cell* 16: 1276-1287**

Pubmed: [Author and Title](#)

Google Scholar: [Author Only](#) [Title Only](#) [Author and Title](#)

**Li YL, Song GQ, Gao J, Zhang SJ, Zhang RZ, Li W, Chen ML, Liu M, Xia XC, Risacher T, Li GY (2018) Enhancement of grain number per spike by RNA interference of cytokinin oxidase 2 gene in bread wheat. *Hereditas* 155**

Pubmed: [Author and Title](#)

Google Scholar: [Author Only](#) [Title Only](#) [Author and Title](#)

**Liu Z, Lv Y, Zhang M, Liu Y, Kong L, Zou M, Lu G, Cao J, Yu X (2013) Identification, expression, and comparative genomic analysis of**



**the IPT and CKX gene families in Chinese cabbage (*Brassica rapa* ssp. *pekinensis*). *BMC Genomics* 14: 594**

Pubmed: [Author and Title](#)

Google Scholar: [Author Only](#) [Title Only](#) [Author and Title](#)

**Lu J, Chang C, Zhang HP, Wang SX, Sun G, Xiao SH, Ma CX (2015) Identification of a Novel Allele of TaCKX6a02 Associated with Grain Size, Filling Rate and Weight of Common Wheat. *PLoS One* 10: e0144765**

Pubmed: [Author and Title](#)

Google Scholar: [Author Only](#) [Title Only](#) [Author and Title](#)

**Mao CJ, He JM, Liu LN, Deng QM, Yao XF, Liu CM, Qiao YL, Li P, Ming F (2019) OsNAC2 integrates auxin and cytokinin pathways to modulate rice root development. *Plant Biotechnology Journal***

Pubmed: [Author and Title](#)

Google Scholar: [Author Only](#) [Title Only](#) [Author and Title](#)

**Martin RC, Mok MC, Habben JE, Mok DWS (2001) A maize cytokinin gene encoding an O-glucosyltransferase specific to cis-zeatin. *Proceedings of the National Academy of Sciences of the United States of America* 98: 5922-5926**

Pubmed: [Author and Title](#)

Google Scholar: [Author Only](#) [Title Only](#) [Author and Title](#)

**Mrizova K, Jiskrova E, Vyrubalova S, Novak O, Ohnoutkova L, Pospisilova H, Frebort I, Harwood WA, Galuszka P (2013) Overexpression of cytokinin dehydrogenase genes in barley (*Hordeum vulgare* cv. Golden Promise) fundamentally affects morphology and fertility. *PLoS One* 8: e79029**

Pubmed: [Author and Title](#)

Google Scholar: [Author Only](#) [Title Only](#) [Author and Title](#)

**Murray MG, Thompson WF (1980) Rapid Isolation of High Molecular-Weight Plant DNA. *Nucleic Acids Research* 8: 4321-4325**

Pubmed: [Author and Title](#)

Google Scholar: [Author Only](#) [Title Only](#) [Author and Title](#)

**Nadolska-Orczyk A, Rajchel IK, Orczyk W, Gasparis S (2017) Major genes determining yield-related traits in wheat and barley. *Theoretical and Applied Genetics* 130: 1081-1098**

Pubmed: [Author and Title](#)

Google Scholar: [Author Only](#) [Title Only](#) [Author and Title](#)

**Ogonowska H, Barchacka K, Gasparis S, Jablonski B, Orczyk W, Dmochowska-Boguta M, Nadolska-Orczyk A (2019) Specificity of expression of TaCKX family genes in developing plants of wheat and their co-operation within and among organs. *Plos One* 14**

Pubmed: [Author and Title](#)

Google Scholar: [Author Only](#) [Title Only](#) [Author and Title](#)

**Pacifici E, Polverari L, Sabatini S (2015) Plant hormone cross-talk: the pivot of root growth. *Journal of Experimental Botany* 66: 1113-1121**

Pubmed: [Author and Title](#)

Google Scholar: [Author Only](#) [Title Only](#) [Author and Title](#)

**Panda BB, Sekhar S, Dash SK, Behera L, Shaw BP (2018) Biochemical and molecular characterisation of exogenous cytokinin application on grain filling in rice. *BMC Plant Biology* 18**

Pubmed: [Author and Title](#)

Google Scholar: [Author Only](#) [Title Only](#) [Author and Title](#)

**Polanska L, Vicankova A, Novakova M, Malbeck J, Dobrev PI, Brzobohaty B, Vankova R, Machackova I (2007) Altered cytokinin metabolism affects cytokinin, auxin, and abscisic acid contents in leaves and chloroplasts, and chloroplast ultrastructure in transgenic tobacco. *Journal of Experimental Botany* 58: 637-649**

Pubmed: [Author and Title](#)

Google Scholar: [Author Only](#) [Title Only](#) [Author and Title](#)

**Potter KC, Wang J, Schaller GE, Kieber JJ (2018) Cytokinin modulates context-dependent chromatin accessibility through the type-B response regulators. *Nature Plants* 4: 1102-1111**

Pubmed: [Author and Title](#)

Google Scholar: [Author Only](#) [Title Only](#) [Author and Title](#)

**Powell AE, Paleczny AR, Olechowski H, Emery RJN (2013) Changes in cytokinin form and concentration in developing kernels correspond with variation in yield among field-grown barley cultivars. *Plant Physiology and Biochemistry* 64: 33-40**

Pubmed: [Author and Title](#)

Google Scholar: [Author Only](#) [Title Only](#) [Author and Title](#)

**Przetakiewicz A, Karas A, Orczyk W, Nadolska-Orczyk A (2004) Agrobacterium-mediated transformation of polyploid cereals. The efficiency of selection and transgene expression in wheat. *Cellular & Molecular Biology Letters* 9: 903-917**

Pubmed: [Author and Title](#)

Google Scholar: [Author Only](#) [Title Only](#) [Author and Title](#)

**Przetakiewicz A, Orczyk W, Nadolska-Orczyk A (2003) The effect of auxin on plant regeneration of wheat, barley and triticale. *Plant Cell Tissue and Organ Culture* 73: 245-256**

Pubmed: [Author and Title](#)

Google Scholar: [Author Only](#) [Title Only](#) [Author and Title](#)

- Ramirez-Gonzalez RH, Borrill P, Lang D, Harrington SA, Brinton J, Venturini L, Davey M, Jacobs J, van Ex F, Pasha A, Khedikar Y, Robinson SJ, Cory AT, Florio T, Concia L, Juery C, Schoonbeek H, Steuernagel B, Xiang D, Ridout CJ, Chalhoub B, Mayer KFX, Benhamed M, Latrasse D, Bendahmane A, Wulff BBH, Appels R, Tiwari V, Datla R, Choulet F, Pozniak CJ, Provart NJ, Sharpe AG, Paux E, Spannagl M, Brautigam A, Uauy C, Sequencing IWG (2018) The transcriptional landscape of polyploid wheat. *Science* 361: 662-+  
Pubmed: [Author and Title](#)  
Google Scholar: [Author Only Title Only Author and Title](#)
- Reid DE, Heckmann AB, Novak O, Kelly S, Stougaard J (2016) CYTOKININ OXIDASE/DEHYDROGENASE3 Maintains Cytokinin Homeostasis during Root and Nodule Development in *Lotus japonicus*. *Plant Physiology* 170: 1060-1074  
Pubmed: [Author and Title](#)  
Google Scholar: [Author Only Title Only Author and Title](#)
- Reynolds M, Braun H (2019) WHEAT BREEDING Benefits to low-input agriculture. *Nature Plants* 5: 652-653  
Pubmed: [Author and Title](#)  
Google Scholar: [Author Only Title Only Author and Title](#)
- Riefler M, Novak O, Strnad M, Schmulling T (2006) Arabidopsis cytokinin receptor mutants reveal functions in shoot growth, leaf senescence, seed size, germination, root development, and cytokinin metabolism. *Plant Cell* 18: 40-54  
Pubmed: [Author and Title](#)  
Google Scholar: [Author Only Title Only Author and Title](#)
- Sakakibara H (2006) Cytokinins: Activity, biosynthesis, and translocation. *Annual Review of Plant Biology* 57: 431-449  
Pubmed: [Author and Title](#)  
Google Scholar: [Author Only Title Only Author and Title](#)
- Sakakibara H (2010) Cytokinin biosynthesis and metabolism. 95-114. In: *Plant Hormones: Biosynthesis, Signal Transduction, Action!* 3rd Edition. Ed. PJ Davies. Springer  
Pubmed: [Author and Title](#)  
Google Scholar: [Author Only Title Only Author and Title](#)
- Saleem M, Lamkemeyer T, Schutzenmeister A, Madlung J, Sakai H, Piepho HP, Nordheim A, Hochholdinger F (2010) Specification of Cortical Parenchyma and Stele of Maize Primary Roots by Asymmetric Levels of Auxin, Cytokinin, and Cytokinin-Regulated Proteins. *Plant Physiology* 152: 4-18  
Pubmed: [Author and Title](#)  
Google Scholar: [Author Only Title Only Author and Title](#)
- Schafer M, Brutting C, Meza-Canales ID, Grosskinsky DK, Vankova R, Baldwin IT, Meldau S (2015) The role of cis-zeatin-type cytokinins in plant growth regulation and mediating responses to environmental interactions. *Journal of Experimental Botany* 66: 4873-4884  
Pubmed: [Author and Title](#)  
Google Scholar: [Author Only Title Only Author and Title](#)
- Schaller GE, Street IH, Kieber JJ (2014) Cytokinin and the cell cycle. *Current Opinion in Plant Biology* 21: 7-15  
Pubmed: [Author and Title](#)  
Google Scholar: [Author Only Title Only Author and Title](#)
- Shimizu-Sato S, Tanaka M, Mori H (2009) Auxin-cytokinin interactions in the control of shoot branching. *Plant Molecular Biology* 69: 429-435  
Pubmed: [Author and Title](#)  
Google Scholar: [Author Only Title Only Author and Title](#)
- Simura J, Antoniadis I, Siroka J, Tarkowska D, Strnad M, Ljung K, Novak O (2018) Plant Hormonomics: Multiple Phytohormone Profiling by Targeted Metabolomics. *Plant Physiology* 177: 476-489  
Pubmed: [Author and Title](#)  
Google Scholar: [Author Only Title Only Author and Title](#)
- Skalak J, Vercruyssen L, Claeys H, Hradilova J, Cerny M, Novak O, Plackova L, Saiz-Fernandez I, Skalakova P, Coppens F, Dhondt S, Koukalova S, Zouhar J, Inze D, Brzobohaty B (2019) Multifaceted activity of cytokinin in leaf development shapes its size and structure in *Arabidopsis*. *Plant Journal* 97: 805-824  
Pubmed: [Author and Title](#)  
Google Scholar: [Author Only Title Only Author and Title](#)
- Song J, Jiang L, Jameson PE (2012) Co-ordinate regulation of cytokinin gene family members during flag leaf and reproductive development in wheat. *BMC Plant Biology* 12: 78  
Pubmed: [Author and Title](#)  
Google Scholar: [Author Only Title Only Author and Title](#)
- Takahagi K, Inoue K, Mochida K (2018) Gene Co-expression Network Analysis Suggests the Existence of Transcriptional Modules Containing a High Proportion of Transcriptionally Differentiated Homoeologs in Hexaploid Wheat. *Frontiers in Plant Science* 9  
Pubmed: [Author and Title](#)  
Google Scholar: [Author Only Title Only Author and Title](#)
- Tanaka M, Takei K, Kojima M, Sakakibara H, Mori H (2006) Auxin controls local cytokinin biosynthesis in the nodal stem in apical dominance. *Plant J* 45: 1028-1036

Pubmed: [Author and Title](#)  
Google Scholar: [Author Only Title Only Author and Title](#)

**Travella S, Klimm TE, Keller B (2006) RNA interference-based gene silencing as an efficient tool for functional genomics in hexaploid bread wheat. *Plant Physiology* 142: 6-20**

Pubmed: [Author and Title](#)  
Google Scholar: [Author Only Title Only Author and Title](#)

**Uauy C (2006) The high grain protein content gene Gpc-B1 accelerates senescence and has pleiotropic effects on protein content in wheat. *Journal of Experimental Botany* 57: 2785-2794**

Pubmed: [Author and Title](#)  
Google Scholar: [Author Only Title Only Author and Title](#)

**Veach YK, Martin RC, Mok DWS, Malbeck J, Vankova R, Mok MC (2003) O-glucosylation of cis-zeatin in maize. Characterization of genes, enzymes, and endogenous cytokinins. *Plant Physiology* 131: 1374-1380**

Pubmed: [Author and Title](#)  
Google Scholar: [Author Only Title Only Author and Title](#)

**Wang WQ, Hao QQ, Wang WL, Li QX, Chen FJ, Ni F, Wang Y, Fu DL, Wu JJ, Wang W (2019) The involvement of cytokinin and nitrogen metabolism in delayed flag leaf senescence in a wheat stay-green mutant, tasg1. *Plant Science* 278: 70-79**

Pubmed: [Author and Title](#)  
Google Scholar: [Author Only Title Only Author and Title](#)

**Werner T, Motyka V, Laucou V, Smets R, Van Onckelen H, Schmullig T (2003) Cytokinin-deficient transgenic Arabidopsis plants show multiple developmental alterations indicating opposite functions of cytokinins in the regulation of shoot and root meristem activity. *Plant Cell* 15: 2532-2550**

Pubmed: [Author and Title](#)  
Google Scholar: [Author Only Title Only Author and Title](#)

**Werner T, Motyka V, Strnad M, Schmullig T (2001) Regulation of plant growth by cytokinin. *Proc Natl Acad Sci U S A* 98: 10487-10492**

Pubmed: [Author and Title](#)  
Google Scholar: [Author Only Title Only Author and Title](#)

**Werner T, Nehnevajova E, Kollmer I, Novak O, Strnad M, Kramer U, Schmullig T (2010) Root-Specific Reduction of Cytokinin Causes Enhanced Root Growth, Drought Tolerance, and Leaf Mineral Enrichment in Arabidopsis and Tobacco. *Plant Cell* 22: 3905-3920**

Pubmed: [Author and Title](#)  
Google Scholar: [Author Only Title Only Author and Title](#)

**Zalabak D, Galuszka P, Mrizova K, Podlesakova K, Gu RL, Frebortova J (2014) Biochemical characterization of the maize cytokinin dehydrogenase family and cytokinin profiling in developing maize plantlets in relation to the expression of cytokinin dehydrogenase genes. *Plant Physiology and Biochemistry* 74: 283-293**

Pubmed: [Author and Title](#)  
Google Scholar: [Author Only Title Only Author and Title](#)

**Zalewski W, Galuszka P, Gasparis S, Orczyk W, Nadolska-Orczyk A (2010) Silencing of the HvCKX1 gene decreases the cytokinin oxidase/dehydrogenase level in barley and leads to higher plant productivity. *Journal of Experimental Botany* 61: 1839-1851**

Pubmed: [Author and Title](#)  
Google Scholar: [Author Only Title Only Author and Title](#)

**Zalewski W, Gasparis S, Boczkowska M, Rajchel IK, Kala M, Orczyk W, Nadolska-Orczyk A (2014) Expression patterns of HvCKX genes indicate their role in growth and reproductive development of barley. *PLoS One* 9: e115729**

Pubmed: [Author and Title](#)  
Google Scholar: [Author Only Title Only Author and Title](#)

**Zalewski W, Orczyk W, Gasparis S, Nadolska-Orczyk A (2012) HvCKX2 gene silencing by biolistic or Agrobacterium-mediated transformation in barley leads to different phenotypes. *BMC Plant Biology* 12: 1-12**

Pubmed: [Author and Title](#)  
Google Scholar: [Author Only Title Only Author and Title](#)

**Zd'arska M, Zatloukalova P, Benitez M, Sedo O, Potesil D, Novak O, Svacinova J, Pesek B, Malbeck J, Vasickova J, Zdrahal Z, Hejatko J (2013) Proteome Analysis in Arabidopsis Reveals Shoot- and Root-Specific Targets of Cytokinin Action and Differential Regulation of Hormonal Homeostasis. *Plant Physiology* 161: 918-930**

Pubmed: [Author and Title](#)  
Google Scholar: [Author Only Title Only Author and Title](#)

**Zhang J, Yu GH, Wen VW, Ma XQ, Xu B, Huang BR (2016) Functional characterization and hormonal regulation of the PHEOPHYTINASE gene LpPPH controlling leaf senescence in perennial ryegrass. *Journal of Experimental Botany* 67: 935-945**

Pubmed: [Author and Title](#)  
Google Scholar: [Author Only Title Only Author and Title](#)

**Zhang L, Zhao YL, Gao LF, Zhao GY, Zhou RH, Zhang BS, Jia JZ (2012) TaCKX6-D1, the ortholog of rice OsCKX2, is associated with grain weight in hexaploid wheat. *New Phytologist* 195: 574-584**

Pubmed: [Author and Title](#)  
Google Scholar: [Author Only Title Only Author and Title](#)

Zubko E, Adams CJ, Machaekova I, Malbeck J, Scollan C, Meyer P (2002) Activation tagging identifies a gene from *Petunia hybrida* responsible for the production of active cytokinins in plants. *Plant Journal* 29: 797-808

Pubmed: [Author and Title](#)

Google Scholar: [Author Only](#) [Title Only](#) [Author and Title](#)
